# Supplementary material
Source: PubMed Central journal article supplement (PMC6811864)
Supplement: ao9b02043_si_001.pdf [file ao9b02043_si_001.pdf]

# Synthesis of Pyrrolo[2,3-*c*]isoquinolines *via* the Cycloaddition of Benzyne with Arylideneaminopyrroles: Photophysical and Crystallographic Study

Juan-Carlos Castillo,<sup>†,‡</sup> Alexis Tigreros,<sup>†</sup> Yoann Coquerel,<sup>§</sup> Jean Rodríguez,<sup>§</sup> Mario A. Macías,<sup>\*,||</sup> and Jaime Portilla<sup>\*,†</sup>

<sup>†</sup>Bioorganic Compounds Research Group, Department of Chemistry, Universidad de los Andes, Carrera 1 No. 18A-10, Bogotá 111711, Colombia.

<sup>‡</sup>Escuela de Ciencias Químicas, Universidad Pedagógica y Tecnológica de Colombia, Tunja 150003, Colombia.

<sup>§</sup>Aix Marseille Université, CNRS, Centrale Marseille, ISM2, 13397 Marseille, France.

<sup>||</sup>Department of Chemistry, Universidad de los Andes, Carrera 1 No. 18A-12, Bogotá 111711, Colombia.

\*Email: [jportill@uniandes.edu.co](mailto:jportill@uniandes.edu.co)

## SUPPORTING INFORMATION

### Content:

1. Overview of reactants, substrates and products numbering.....p.S2
2. Copies of NMR spectra of novel compounds **6d–h** and **8a–c**.....p.S3
3. HRMS analysis data of novel compounds.....p.S11
4. ORTEP plots of compounds **6e–g** and **8b–c**.....p.S18
5. Tables and figures of crystallographic details.....p.S19

## 1. Overview of reactants, substrates and products numbering

5-Amino-1-(*tert*-butyl)-1*H*-pyrrole-3-carbonitrile (**4**), 2,4-dichlorobenzaldehyde (**5c**), benzaldehyde (**5d**), 4-methoxybenzaldehyde (**5e**), 4-(diphenylamino)benzaldehyde (**5f**), 4-fluorobenzaldehyde (**5g**), and 4-bromobenzaldehyde (**5h**).

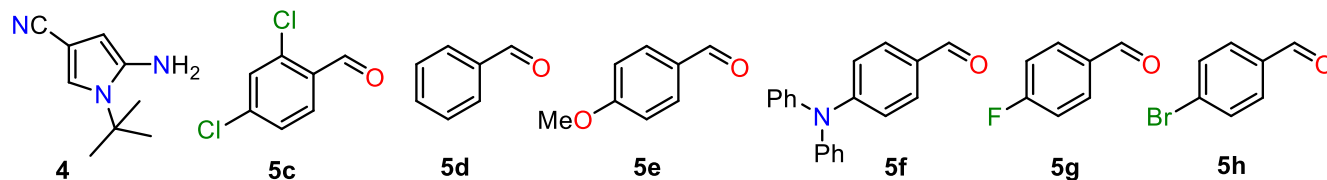

**Figure S1.** Structure of reactants **4** and **5c-h**

(*E*)-5-(Benzyldeneamino)-1-(*tert*-butyl)-1*H*-pyrrole-3-carbonitrile (**6d**), (*E*)-1-(*tert*-butyl)-5-((4-methoxybenzylidene)amino)-1*H*-pyrrole-3-carbonitrile (**6e**), (*E*)-1-(*tert*-butyl)-5-((4-(diphenylamino)benzylidene)amino)-1*H*-pyrrole-3-carbonitrile (**6f**), (*E*)-1-(*tert*-butyl)-5-((4-fluorobenzylidene)amino)-1*H*-pyrrole-3-carbonitrile (**6g**), and (*E*)-5-((4-bromobenzylidene)amino)-1-(*tert*-butyl)-1*H*-pyrrole-3-carbonitrile (**6h**).

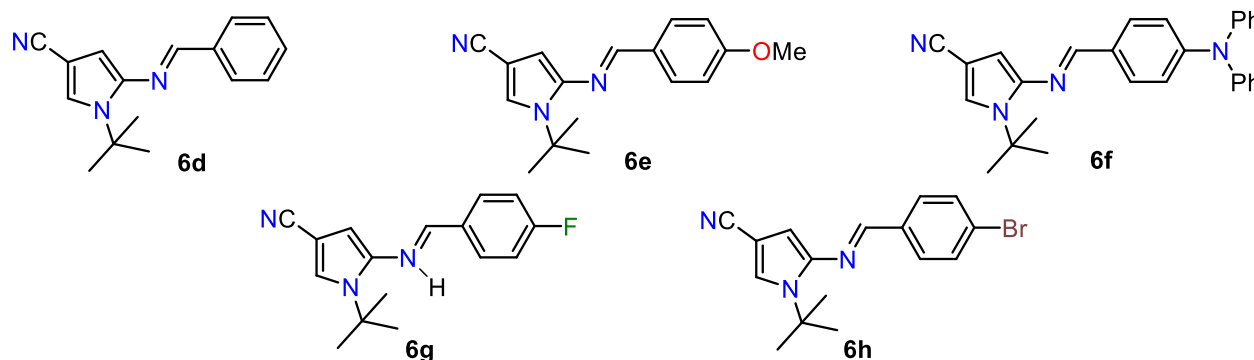

**Figure S2.** Structure of arylideneaminopyrroles **6d-h**

3-(*tert*-Butyl)-5-(4-methoxyphenyl)-3*H*-pyrrolo[2,3-*c*]isoquinoline-1-carbonitrile (**8a**), 3-(*tert*-butyl)-5-phenyl-3*H*-pyrrolo[2,3-*c*]isoquinoline-1-carbonitrile (**8b**), and 3-(*tert*-butyl)-5-(2,4-dichlorophenyl)-3*H*-pyrrolo[2,3-*c*]isoquinoline-1-carbonitrile (**8c**).

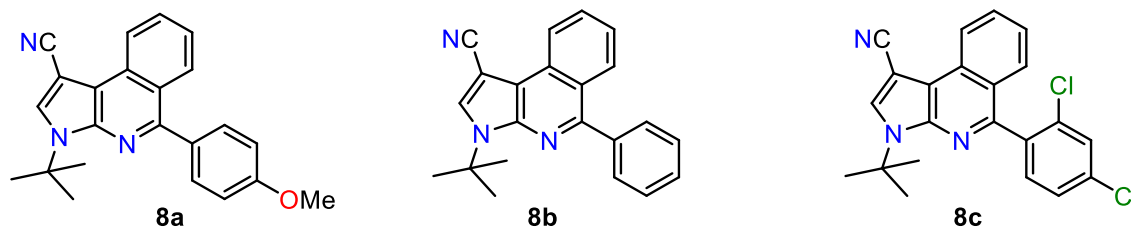

**Figure S3.** Structure of pyrrolo[2,3-*c*]isoquinolines **8a-c**

## 2. Copies of NMR spectra of compounds 6d–h and 8a–c

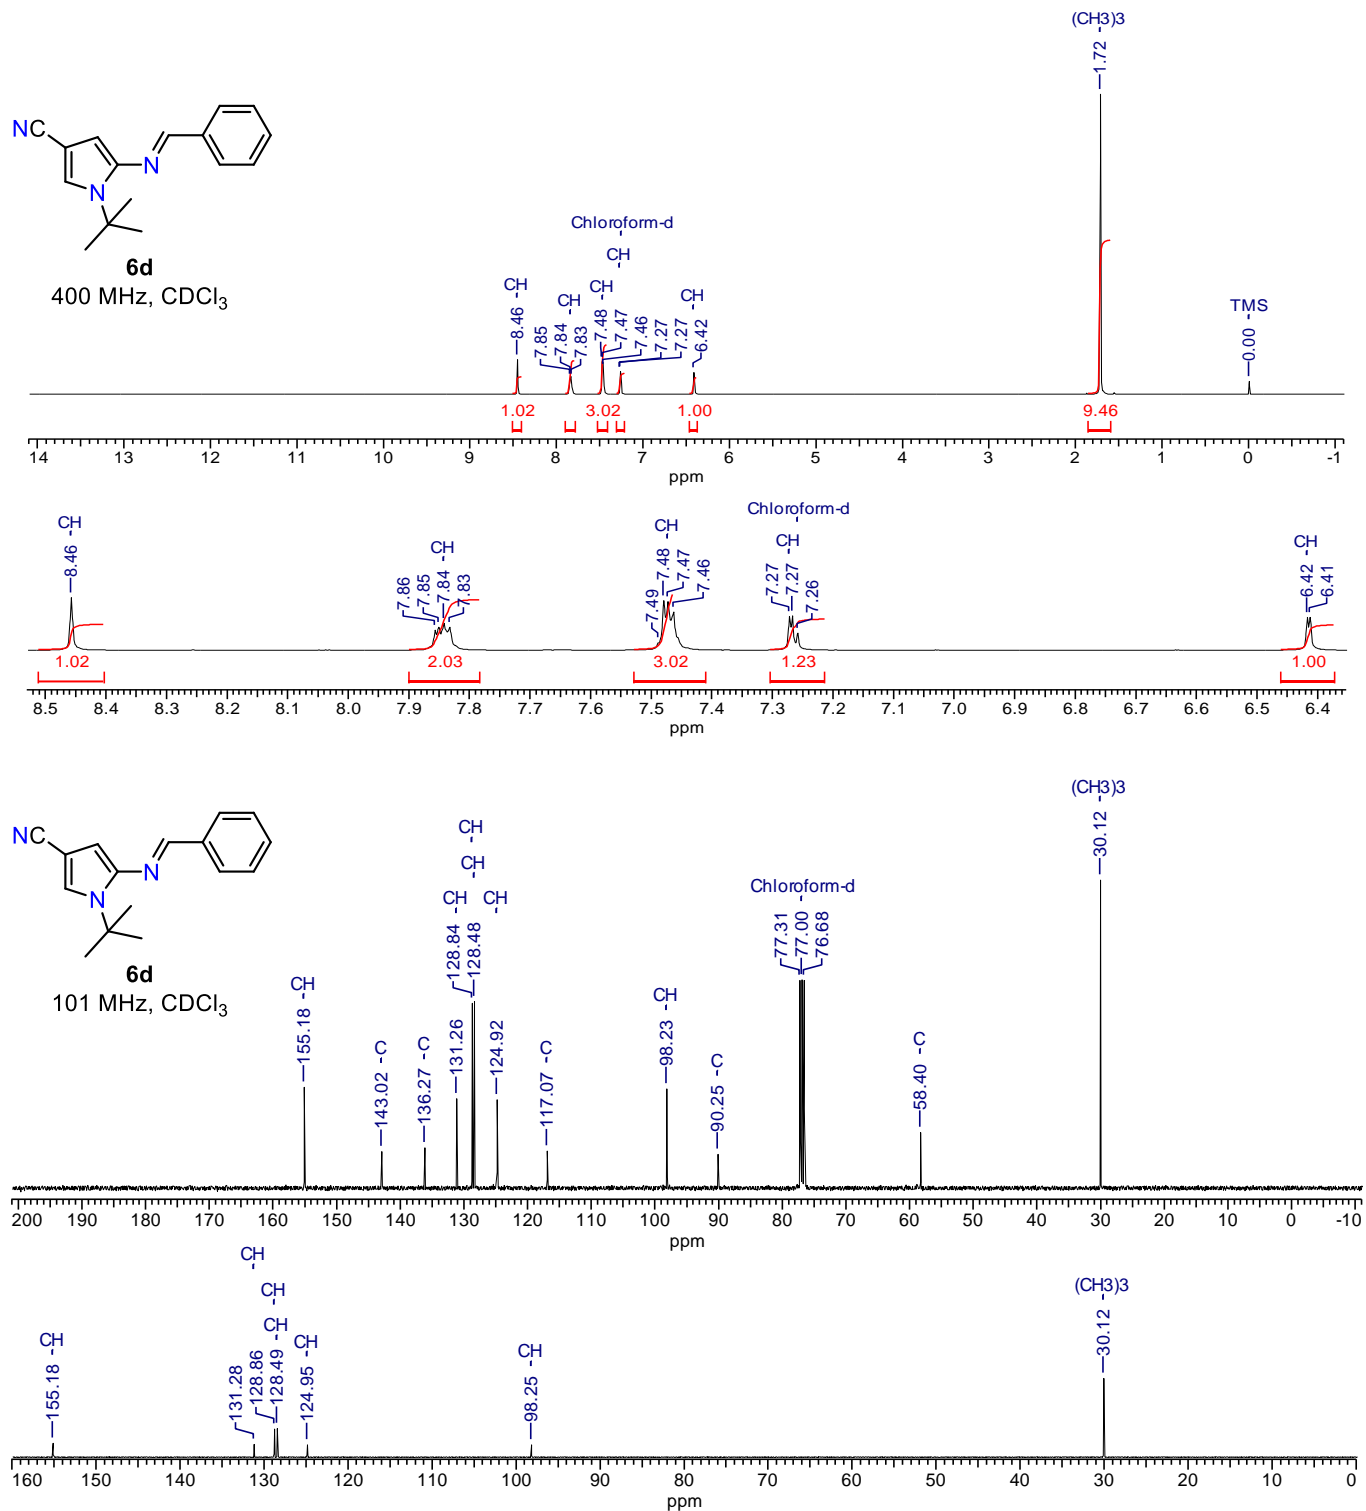

**Figure S4.** <sup>1</sup>H, <sup>13</sup>C{<sup>1</sup>H}, and DEPT-135 NMR spectra of (*E*)-5-(benzylideneamino)-1-(*tert*-butyl)-1*H*-pyrrole-3-carbonitrile (**6d**)

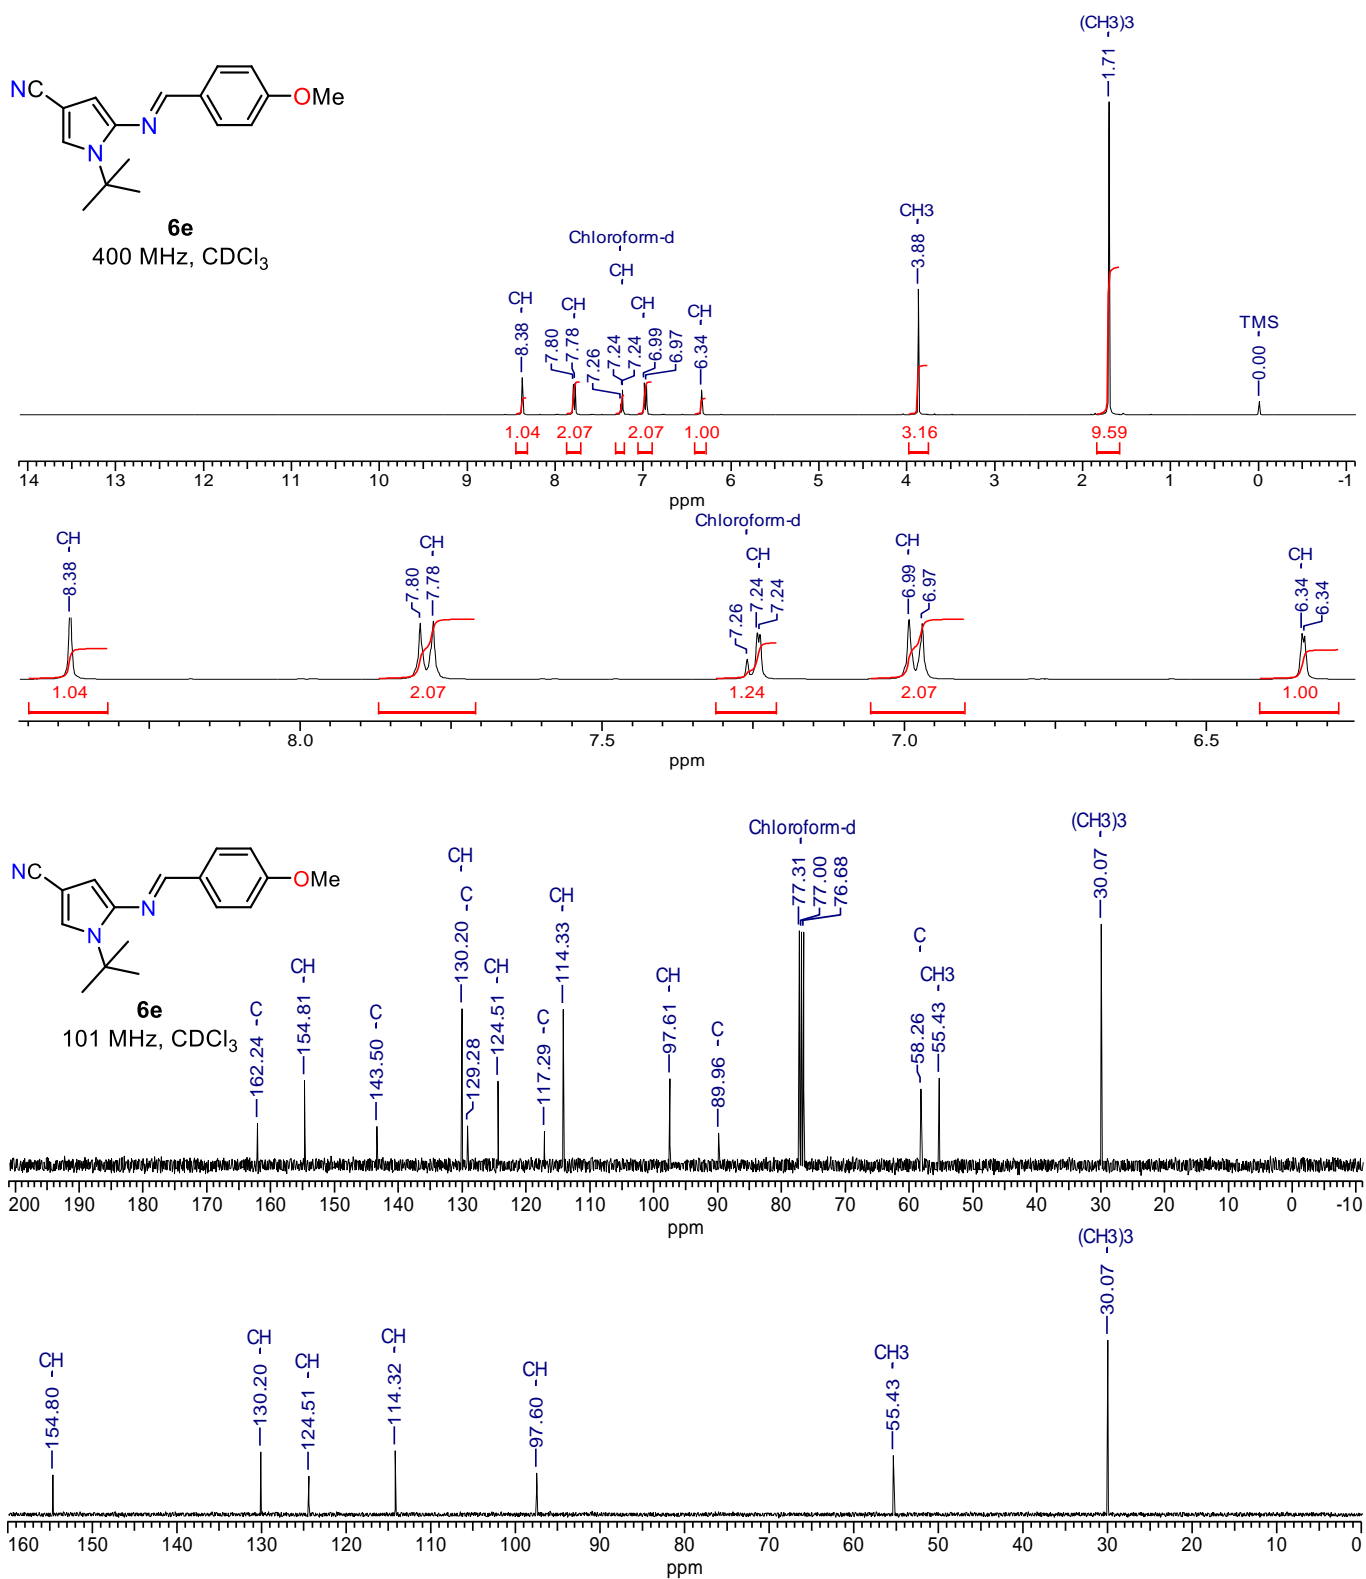

**Figure S5.** <sup>1</sup>H, <sup>13</sup>C{<sup>1</sup>H}, and DEPT-135 NMR spectra of (*E*)-1-(*tert*-butyl)-5-((4-methoxybenzylidene)amino)-1*H*-pyrrole-3-carbonitrile (**6e**)

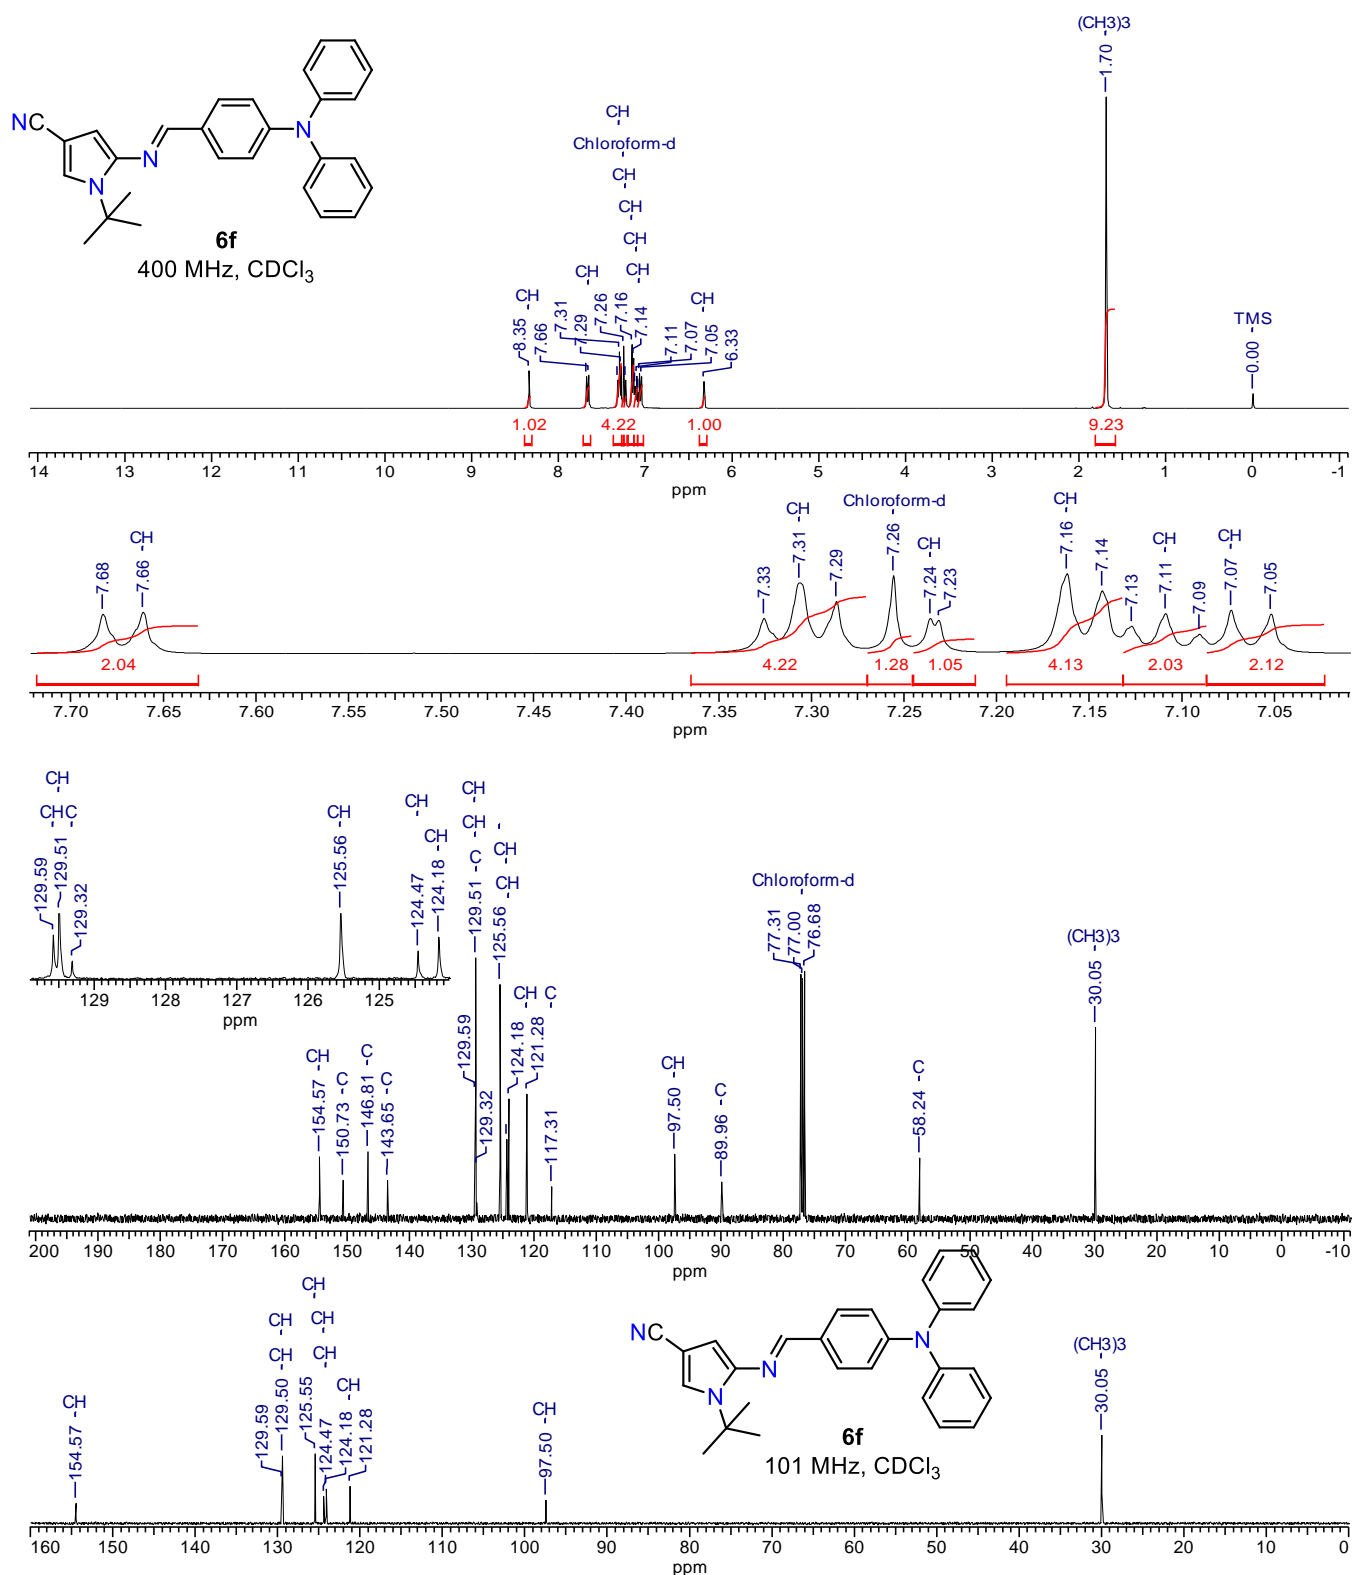

**Figure S6.** <sup>1</sup>H, <sup>13</sup>C{<sup>1</sup>H}, and DEPT-135 NMR spectra of (*E*)-1-(*tert*-butyl)-5-((4-(diphenylamino)benzylidene)amino)-1*H*-pyrrole-3-carbonitrile (**6f**)

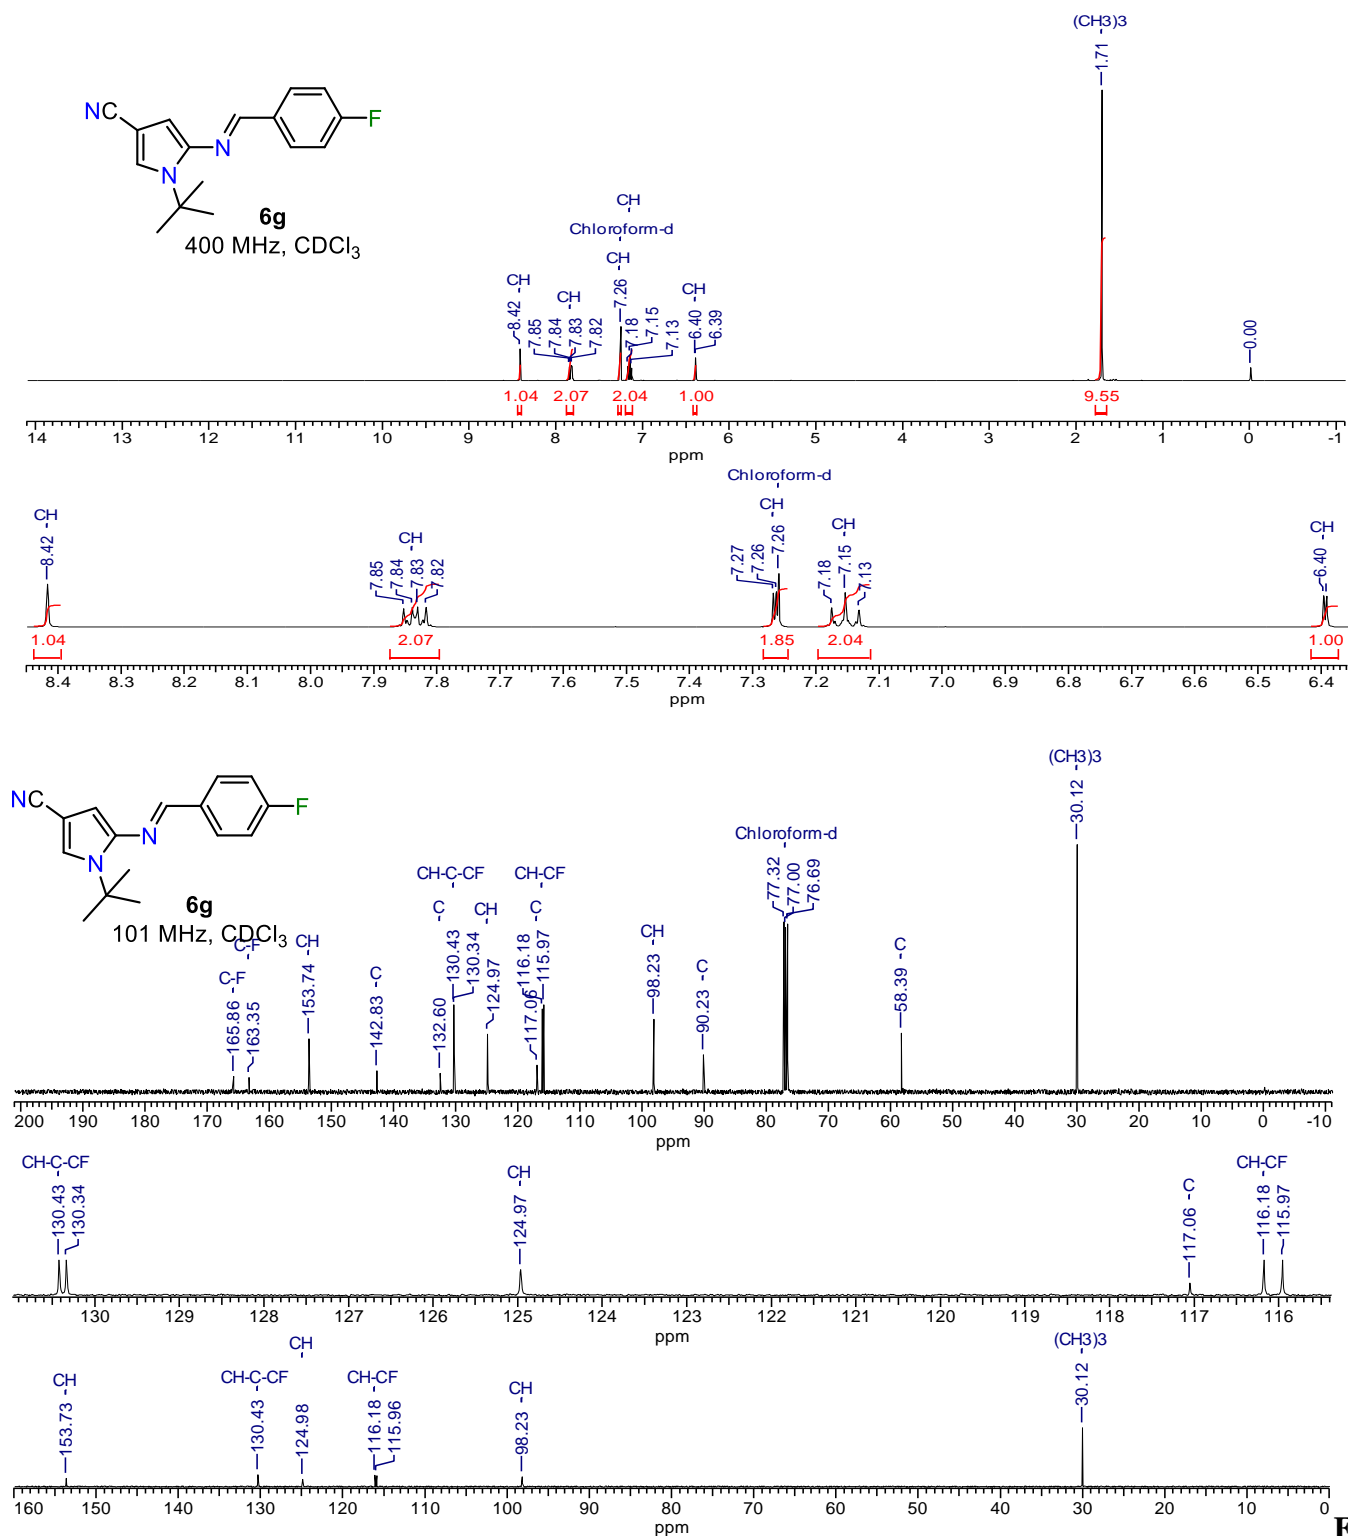

**Figure S7.** <sup>1</sup>H, <sup>13</sup>C{<sup>1</sup>H}, and DEPT-135 of (*E*)-1-(*tert*-butyl)-5-((4-fluorobenzylidene)amino)-1*H*-pyrrole-3-carbonitrile (**6g**)

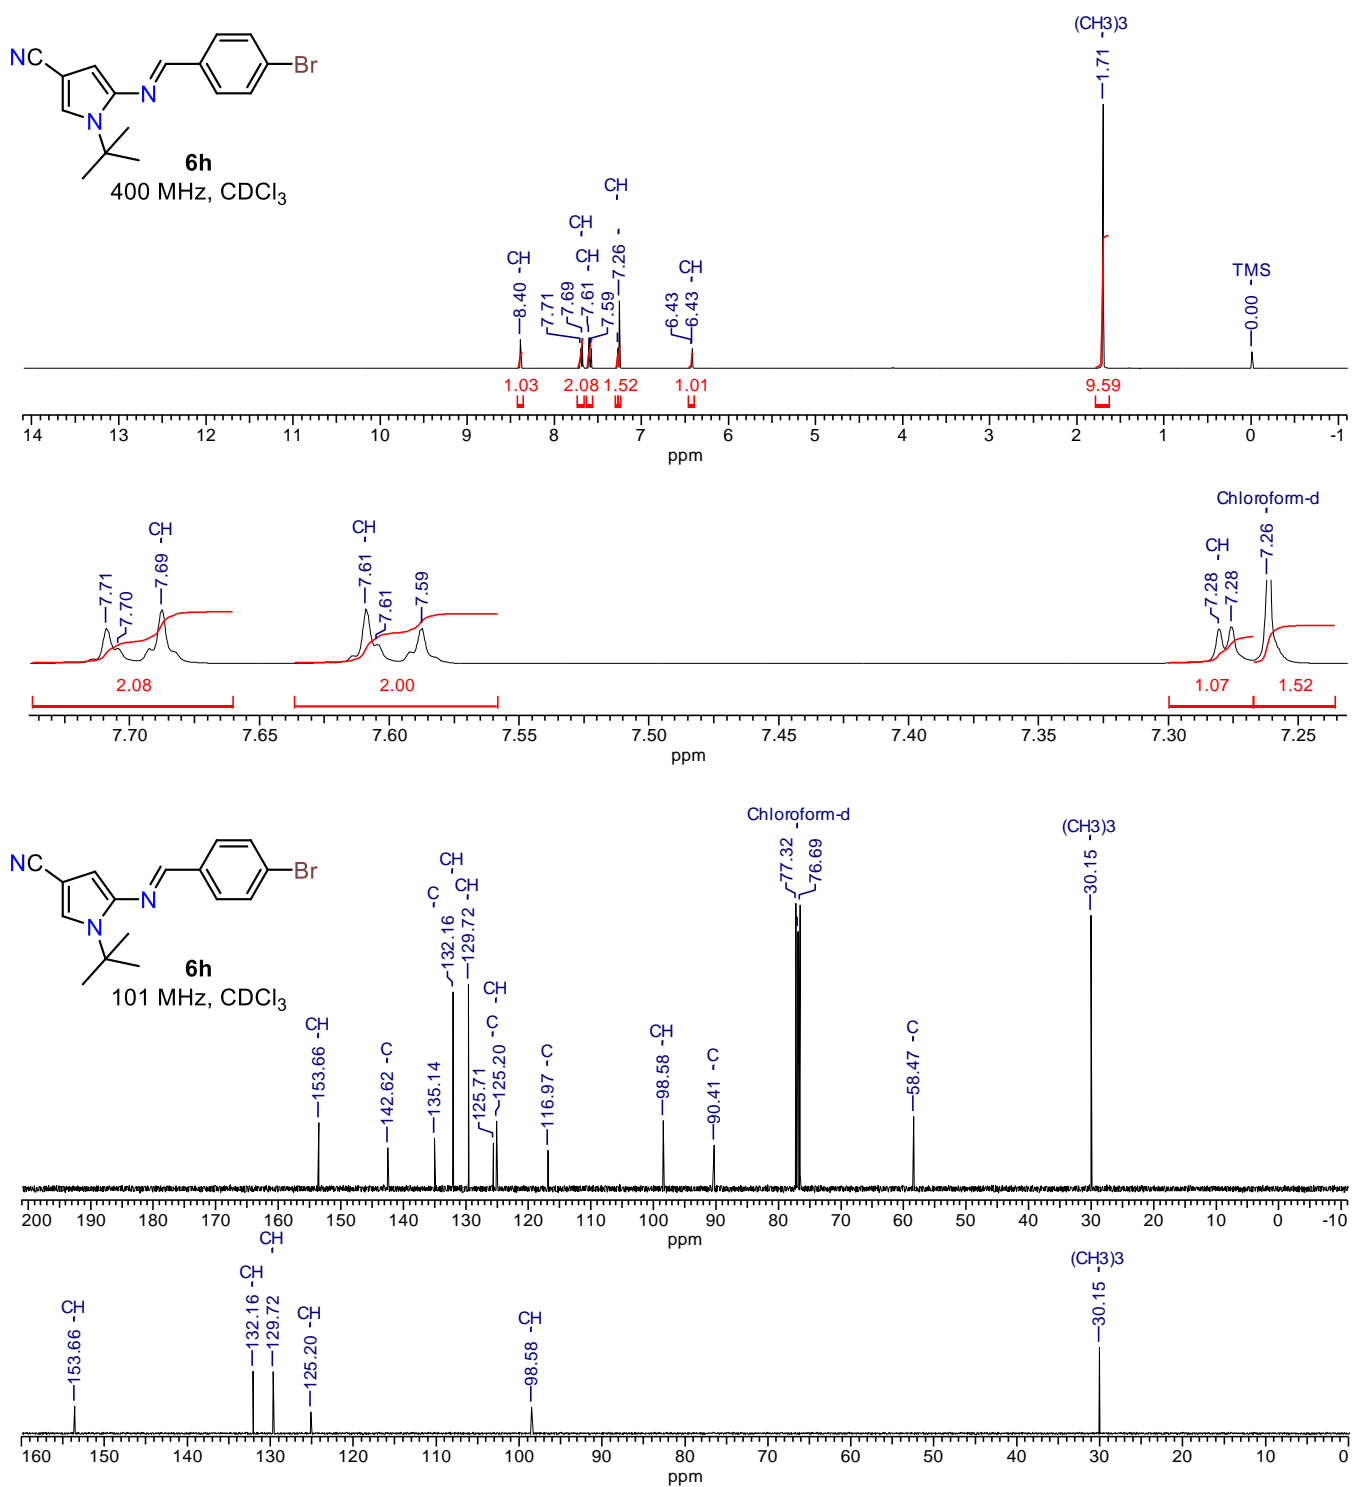

**Figure S8.** <sup>1</sup>H, <sup>13</sup>C{<sup>1</sup>H}, and DEPT-135 of (*E*)-5-((4-bromobenzylidene)amino)-1-(*tert*-butyl)-1*H*-pyrrole-3-carbonitrile (**6h**)

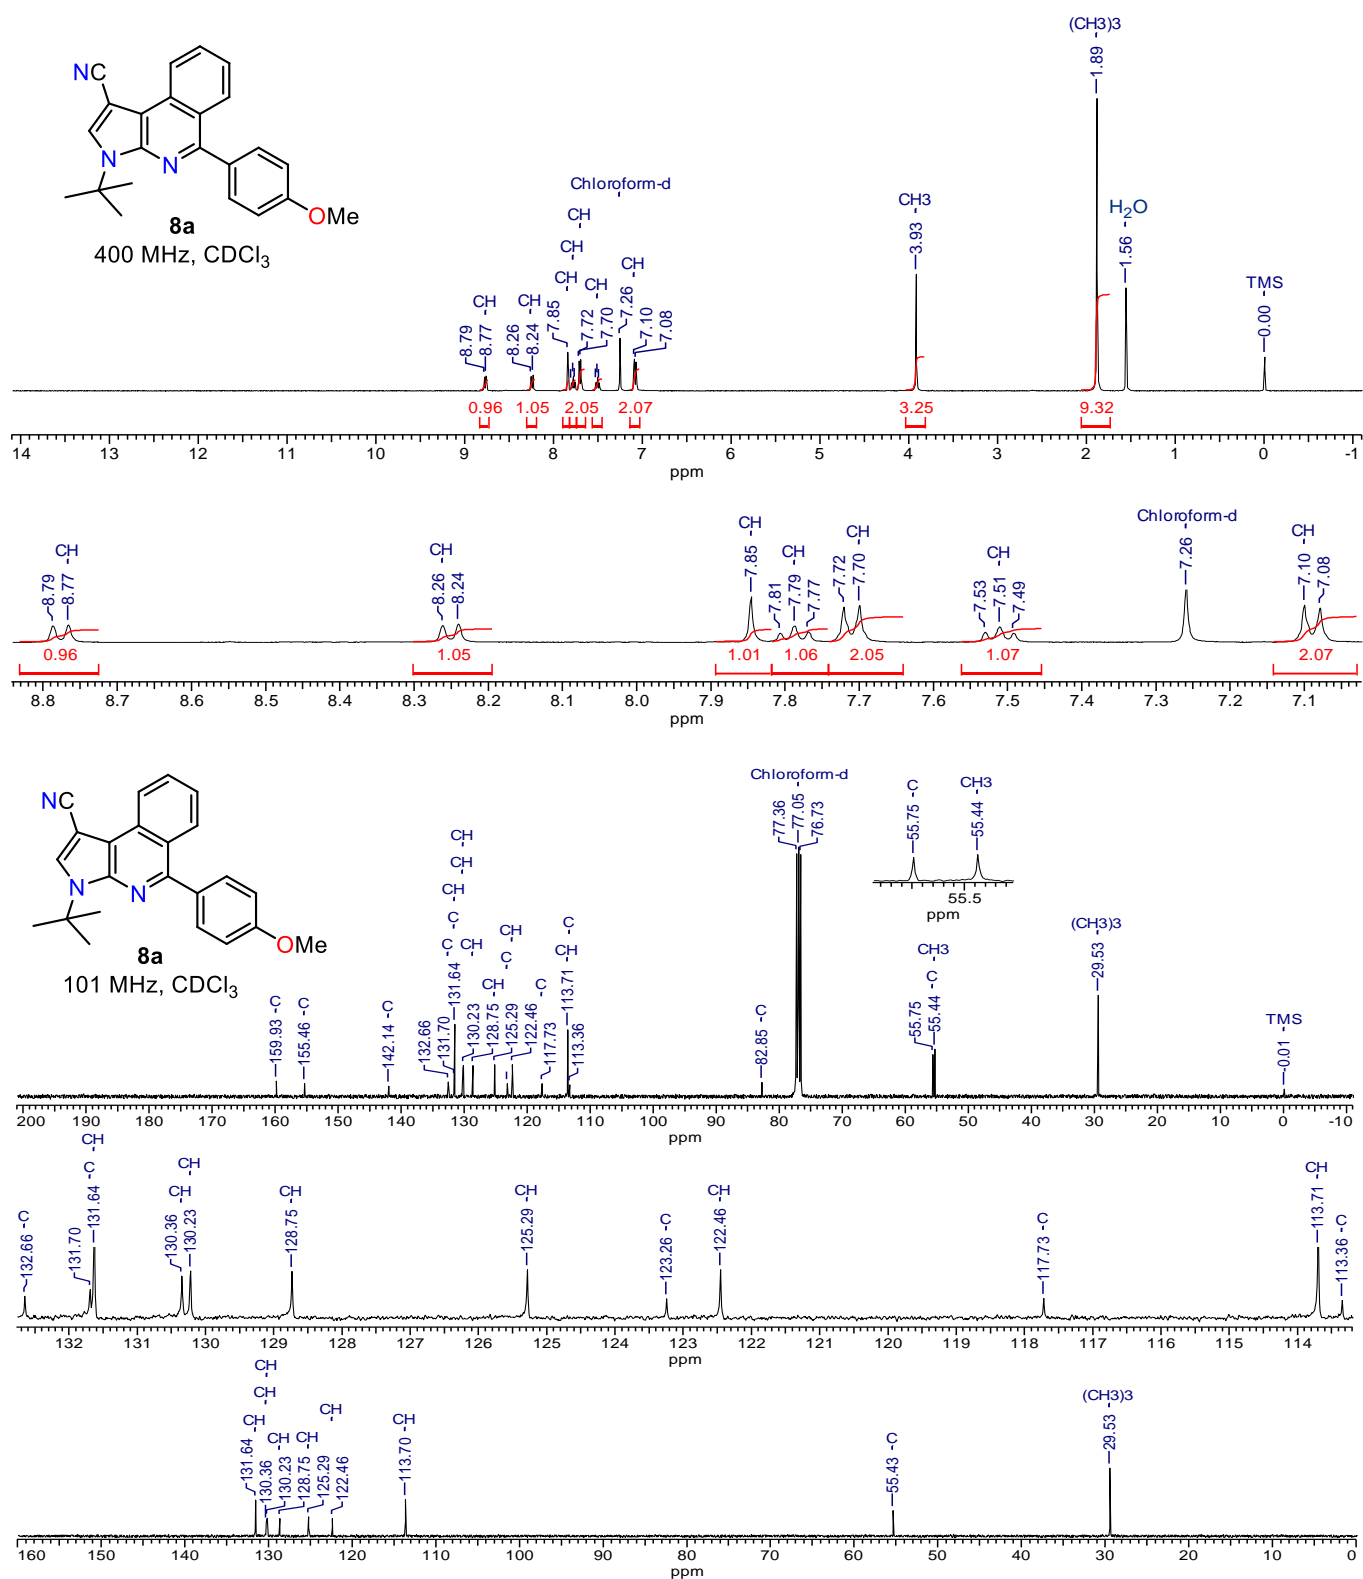

**Figure S9.** <sup>1</sup>H, <sup>13</sup>C{<sup>1</sup>H}, and DEPT-135 NMR spectra of 3-(*tert*-butyl)-5-(4-methoxyphenyl)-3*H*-pyrrolo[2,3-*c*]isoquinoline-1-carbonitrile (**8a**)



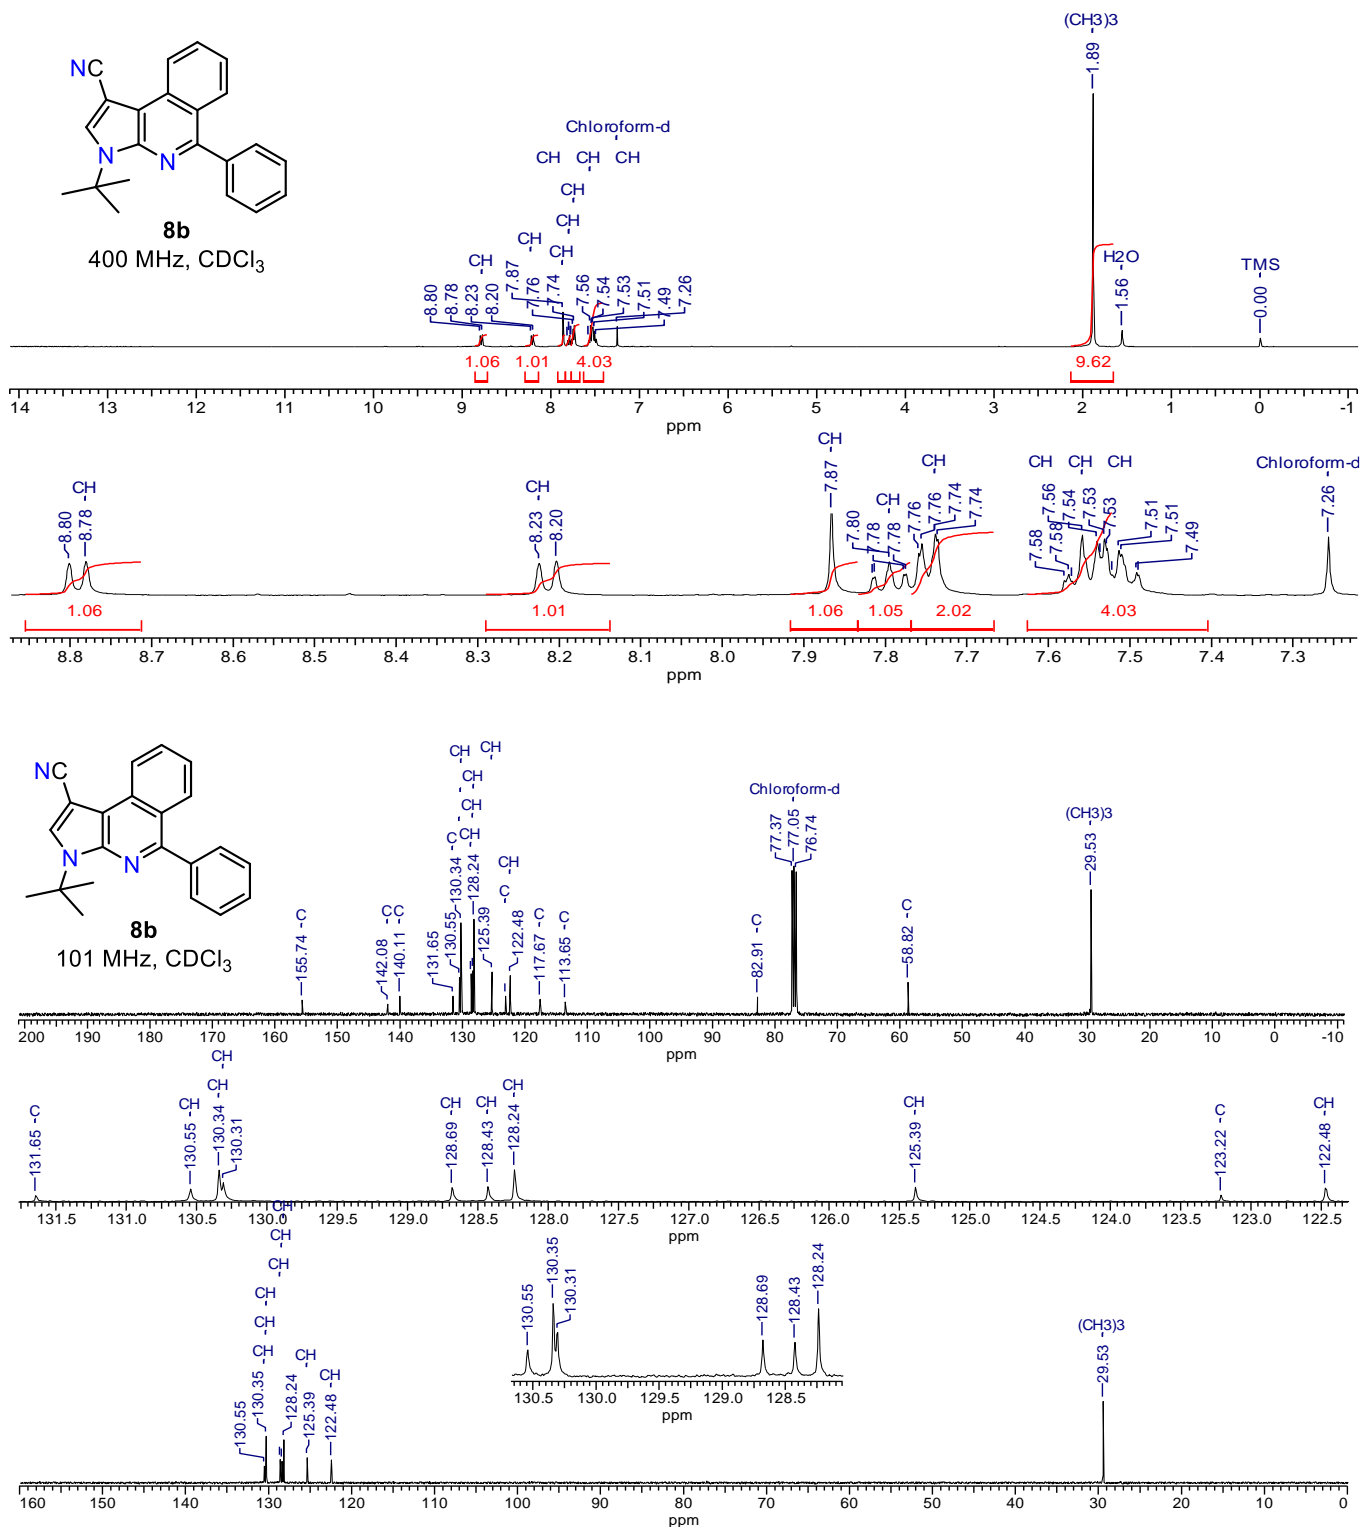

**Figure S10.** <sup>1</sup>H, <sup>13</sup>C{<sup>1</sup>H}, and DEPT-135 NMR spectra of 3-(*tert*-butyl)-5-phenyl-3*H*-pyrrolo[2,3-*c*]isoquinoline-1-carbonitrile (**8b**)

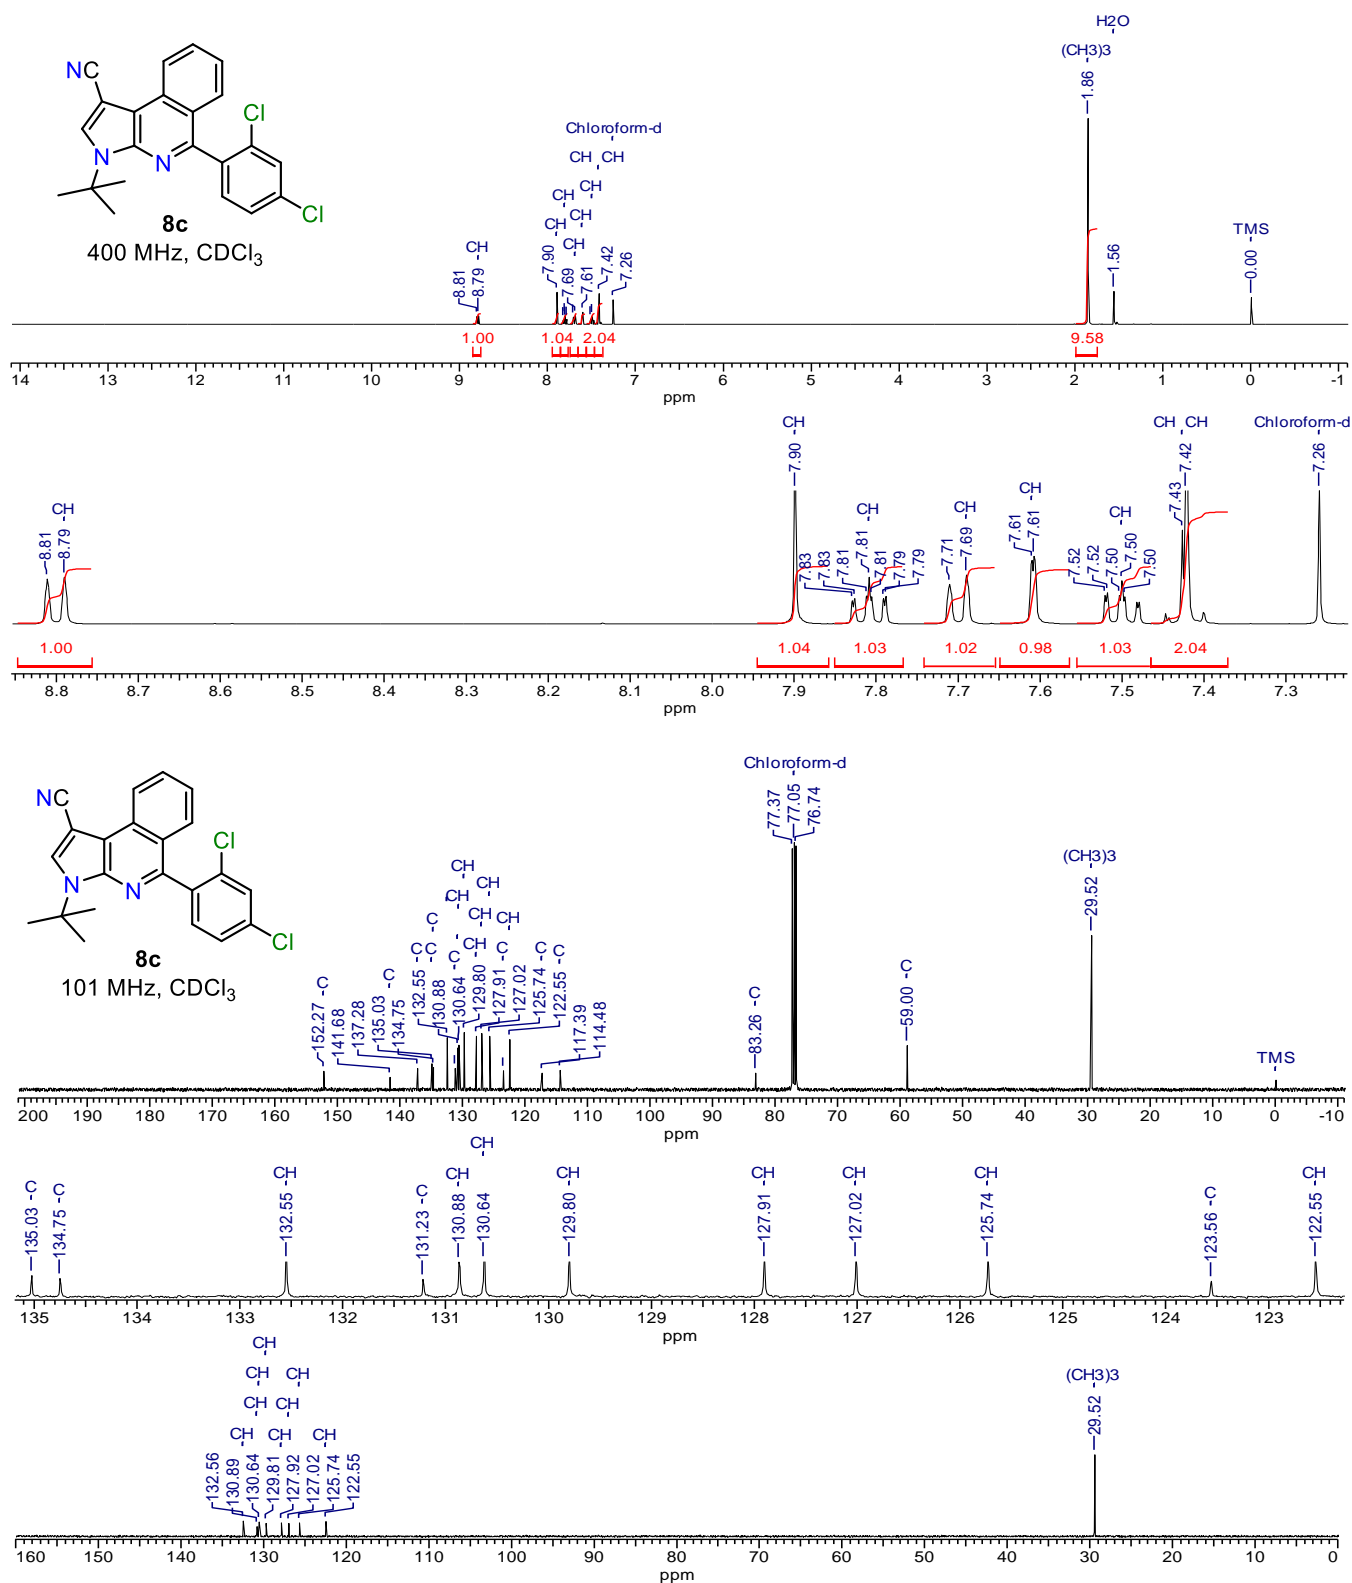

**Figure S11.** <sup>1</sup>H, <sup>13</sup>C{<sup>1</sup>H}, and DEPT-135 NMR spectra of 3-(*tert*-butyl)-5-(2,4-dichlorophenyl)-3*H*-pyrrolo[2,3-*c*]isoquinoline-1-carbonitrile (**8c**)

### 3. HRMS analysis data of novel compounds

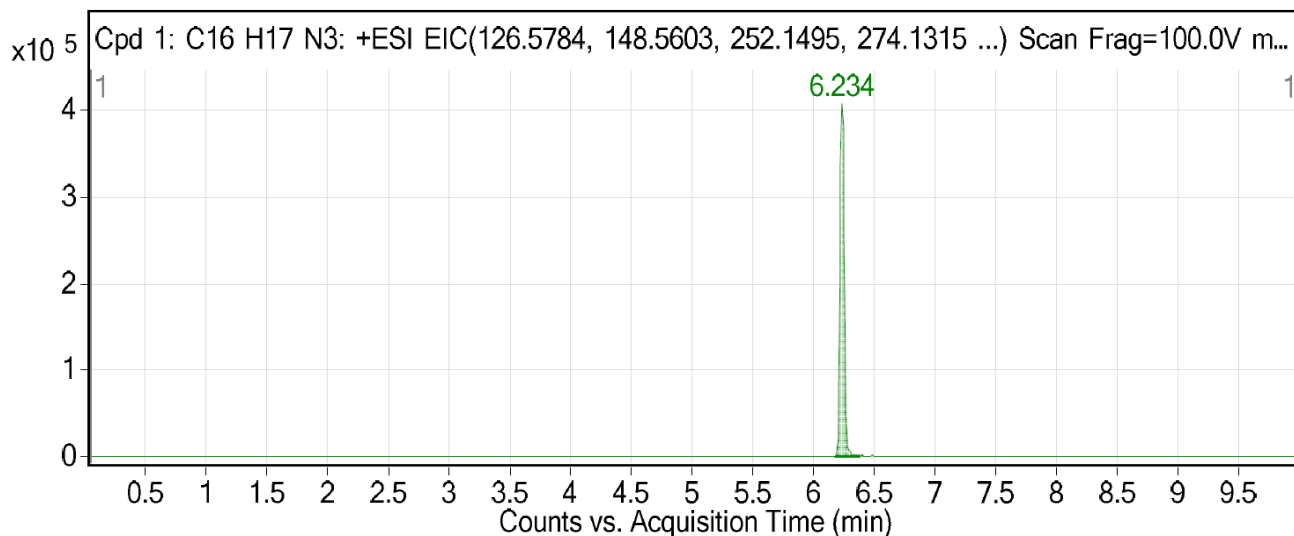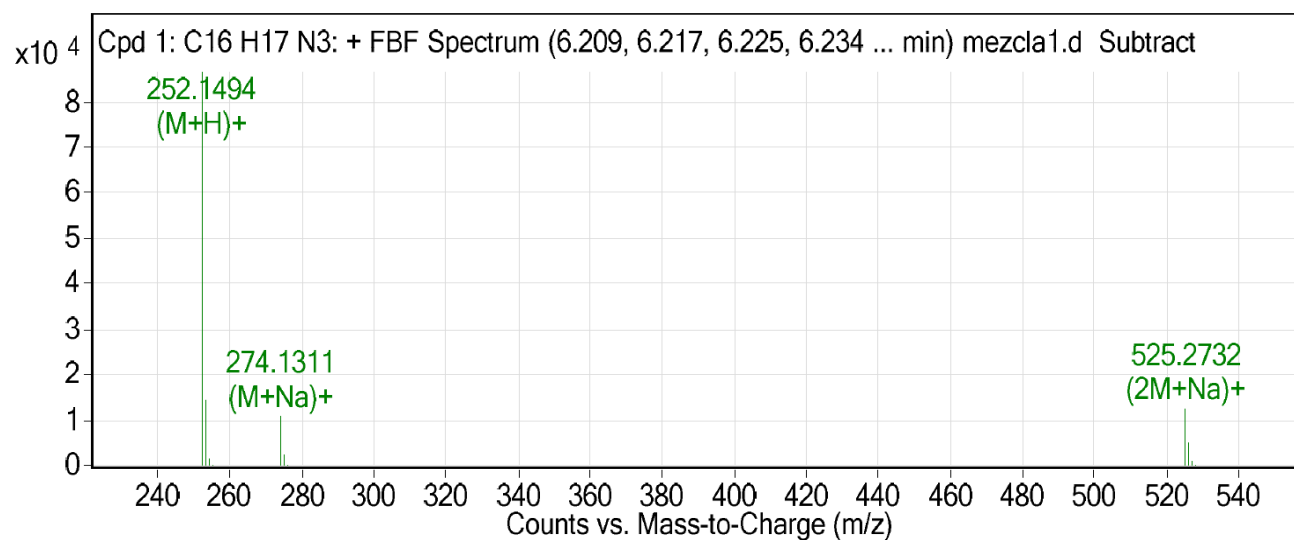

#### MS Spectrum Peak List

| <i>m/z</i> | <i>z</i> | Abund    | Ion                  |
|------------|----------|----------|----------------------|
| 252.1494   | 1        | 86475.82 | (M+H) <sup>+</sup>   |
| 253.1522   | 1        | 14186.59 | (M+H) <sup>+</sup>   |
| 254.156    | 1        | 1271.74  | (M+H) <sup>+</sup>   |
| 255.1593   | 1        | 183.87   | (M+H) <sup>+</sup>   |
| 274.1311   | 1        | 10707.49 | (M+Na) <sup>+</sup>  |
| 275.1333   | 1        | 2276.07  | (M+Na) <sup>+</sup>  |
| 276.1378   | 1        | 142.61   | (M+Na) <sup>+</sup>  |
| 525.2732   | 1        | 12417.32 | (2M+Na) <sup>+</sup> |
| 526.2761   | 1        | 4937.32  | (2M+Na) <sup>+</sup> |
| 527.2811   | 1        | 924.55   | (2M+Na) <sup>+</sup> |

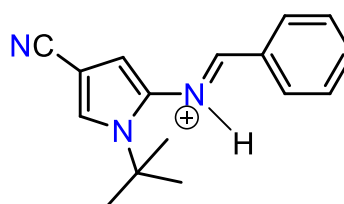

**6d** + H<sup>+</sup>, C<sub>16</sub>H<sub>18</sub>N<sub>3</sub>  
Exact Mass: 252.1495  
Found: 252.1494

**Figure 12.** HRMS analysis of compound **6d**

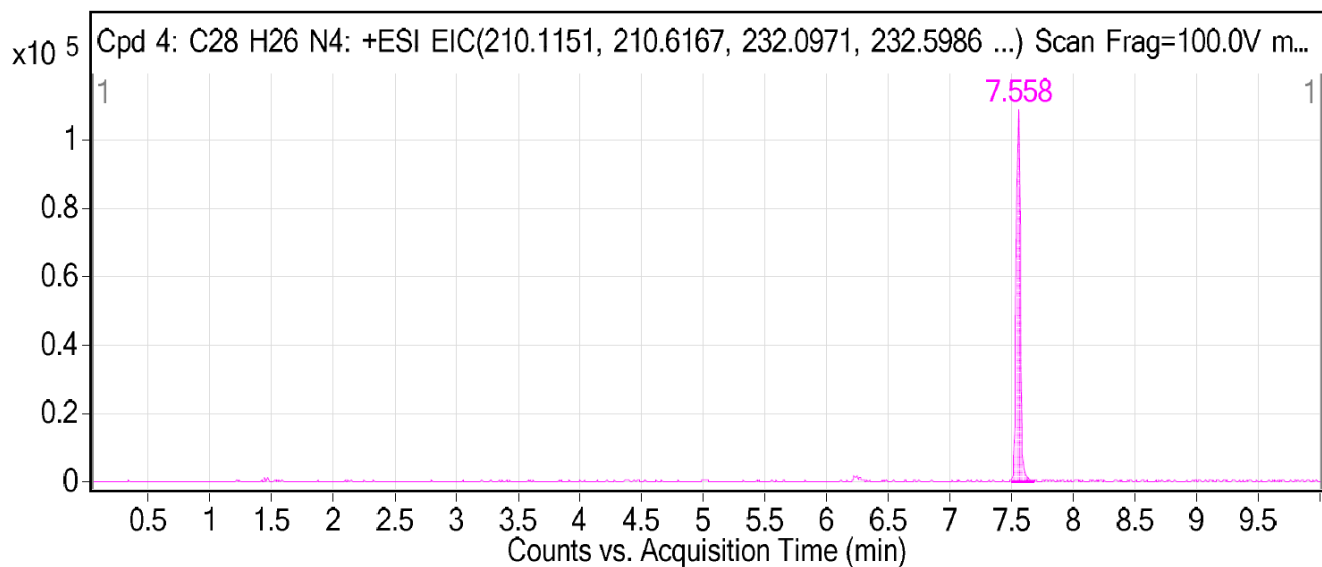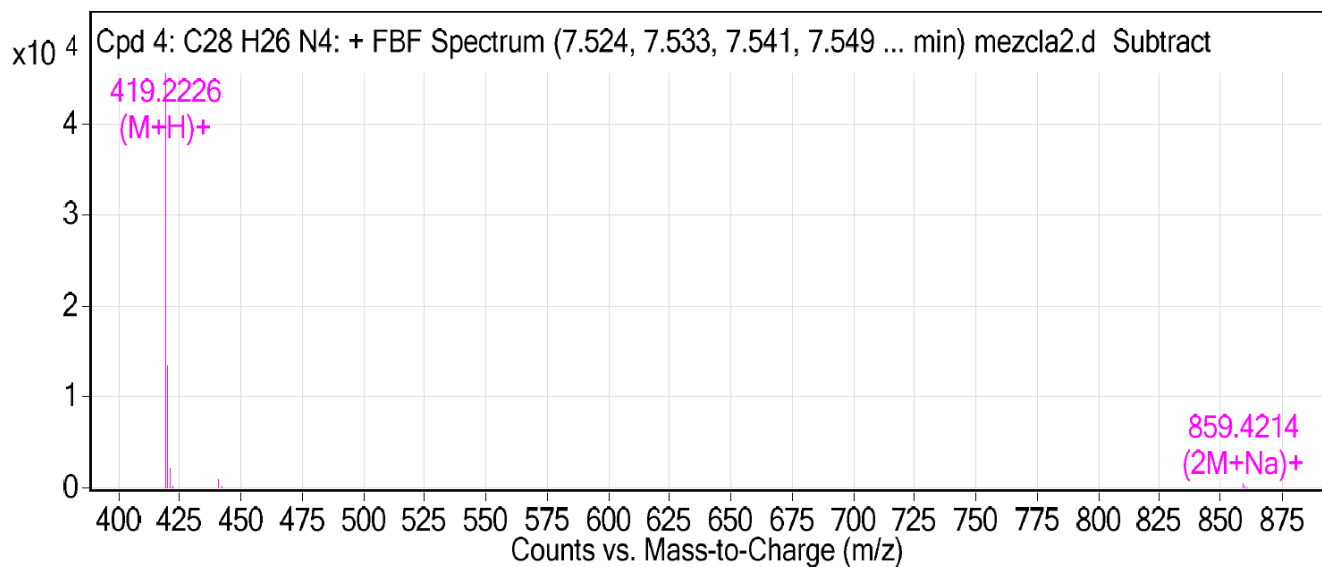

#### MS Spectrum Peak List

| m/z      | z | Abund    | Ion                  |
|----------|---|----------|----------------------|
| 419.2226 | 1 | 45560.24 | (M+H) <sup>+</sup>   |
| 420.2256 | 1 | 13501.32 | (M+H) <sup>+</sup>   |
| 421.2284 | 1 | 2193.37  | (M+H) <sup>+</sup>   |
| 422.2323 | 1 | 193.97   | (M+H) <sup>+</sup>   |
| 441.2033 | 1 | 933.88   | (M+Na) <sup>+</sup>  |
| 442.2095 | 1 | 295.85   | (M+Na) <sup>+</sup>  |
| 859.4214 | 1 | 462.36   | (2M+Na) <sup>+</sup> |
| 860.4269 | 1 | 285.75   | (2M+Na) <sup>+</sup> |
| 861.4331 | 1 | 52.68    | (2M+Na) <sup>+</sup> |

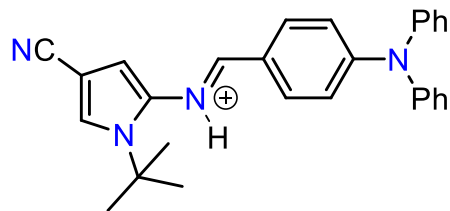

**6f** + H<sup>+</sup>, C<sub>28</sub>H<sub>27</sub>N<sub>4</sub>  
 Exact Mass: 419.2230  
 Found: 419.2226

**Figure 13.** HRMS analysis of compound **6f**

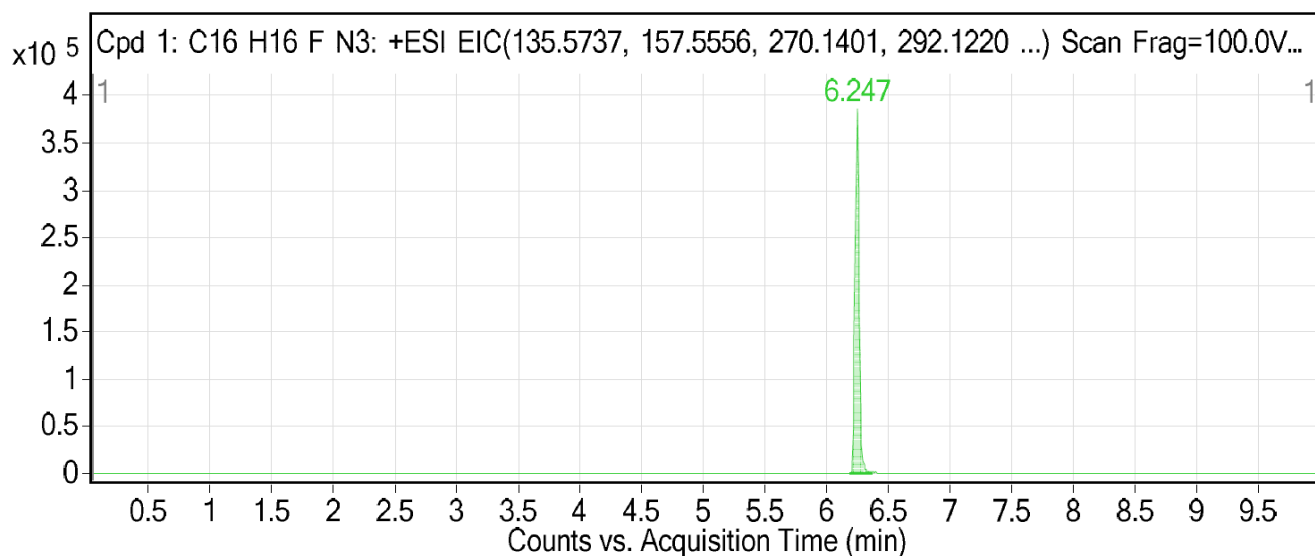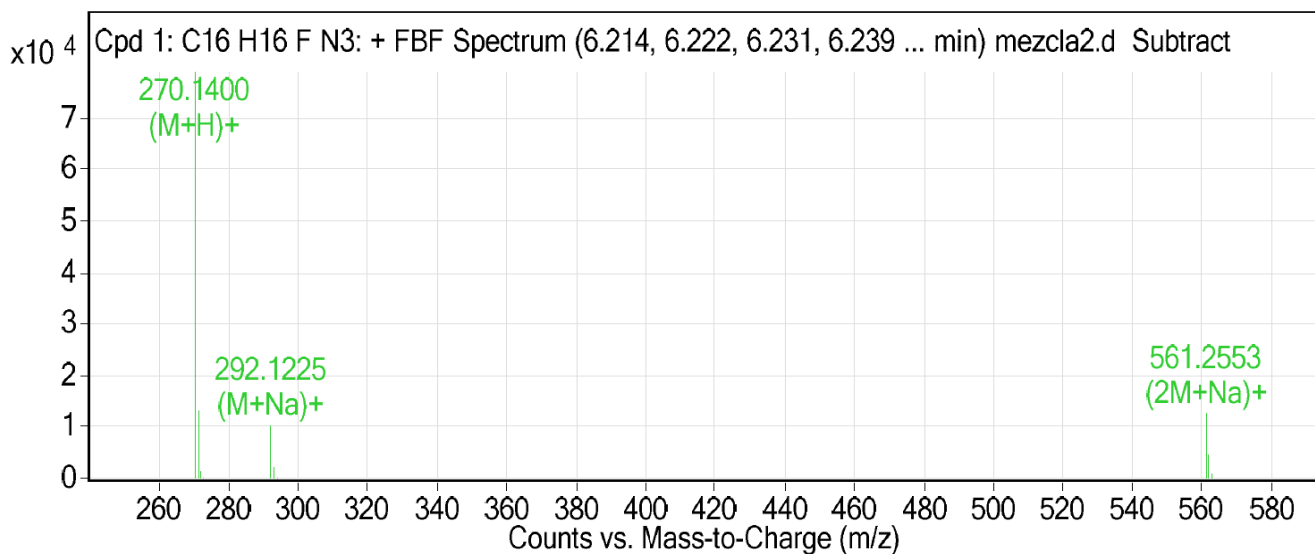

#### MS Spectrum Peak List

| m/z      | z | Abund    | Ion                  |
|----------|---|----------|----------------------|
| 270.14   | 1 | 78803.33 | (M+H) <sup>+</sup>   |
| 271.1434 | 1 | 13080.34 | (M+H) <sup>+</sup>   |
| 272.1472 | 1 | 1242.75  | (M+H) <sup>+</sup>   |
| 273.1496 | 1 | 130.28   | (M+H) <sup>+</sup>   |
| 292.1225 | 1 | 10352.38 | (M+Na) <sup>+</sup>  |
| 293.1265 | 1 | 1856.06  | (M+Na) <sup>+</sup>  |
| 294.1272 | 1 | 168.23   | (M+Na) <sup>+</sup>  |
| 561.2553 | 1 | 12609.19 | (2M+Na) <sup>+</sup> |
| 562.2584 | 1 | 4610.15  | (2M+Na) <sup>+</sup> |
| 563.2615 | 1 | 873.04   | (2M+Na) <sup>+</sup> |

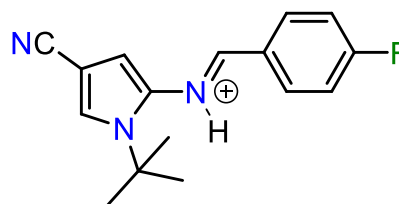

**6g** + H<sup>+</sup>, C<sub>16</sub>H<sub>17</sub>FN<sub>3</sub>  
 Exact Mass: 270.1401  
 Found: 270.1400

**Figure 14.** HRMS analysis of compound **6g**

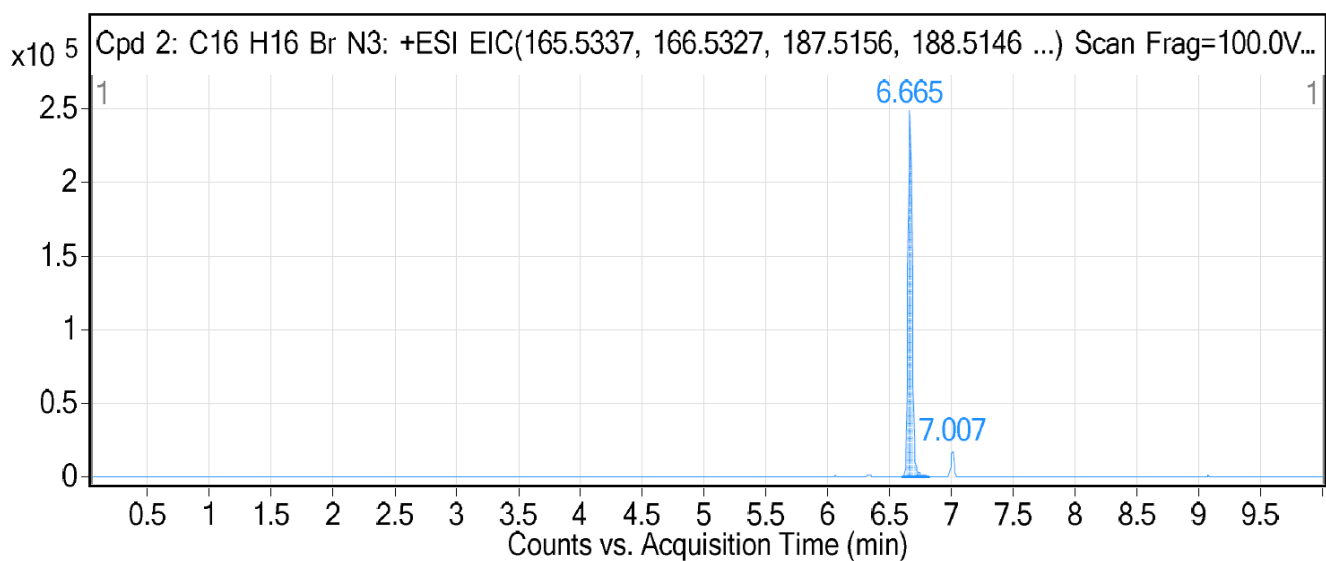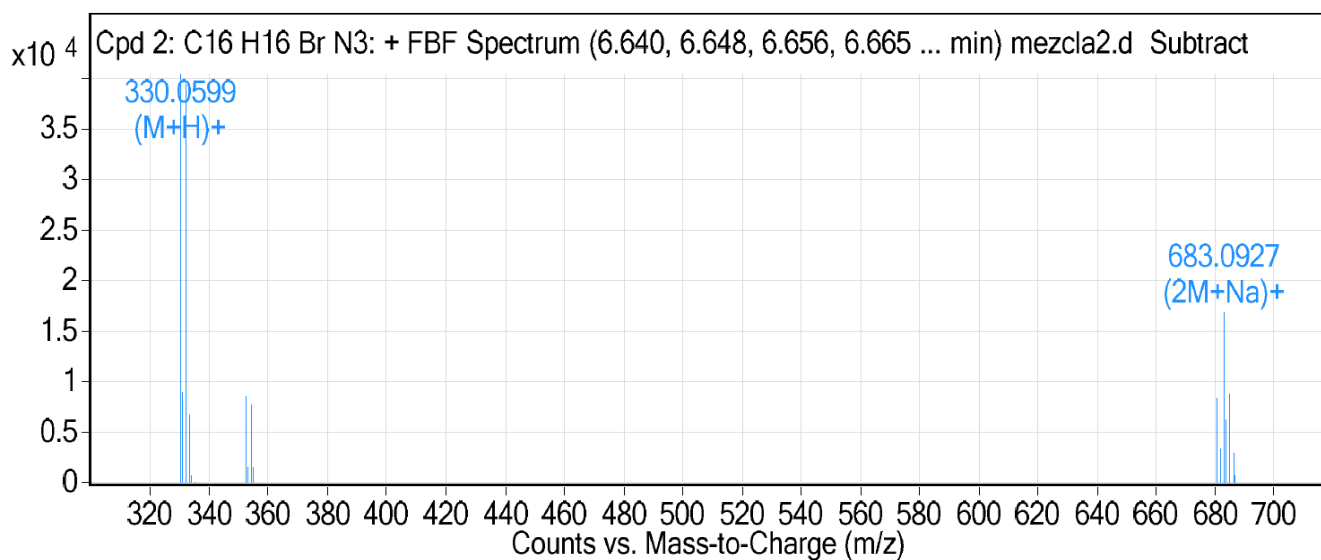

#### MS Spectrum Peak List

| m/z      | z | Abund    | Ion                  |
|----------|---|----------|----------------------|
| 330.0599 | 1 | 40491.25 | (M+H) <sup>+</sup>   |
| 331.0599 | 1 | 8915.53  | (M+H) <sup>+</sup>   |
| 332.0581 | 1 | 39515.48 | (M+H) <sup>+</sup>   |
| 333.061  | 1 | 6732.12  | (M+H) <sup>+</sup>   |
| 352.042  | 1 | 8595.27  | (M+Na) <sup>+</sup>  |
| 354.0402 | 1 | 7679.05  | (M+Na) <sup>+</sup>  |
| 681.0944 | 1 | 8329.81  | (2M+Na) <sup>+</sup> |
| 683.0927 | 1 | 16862.34 | (2M+Na) <sup>+</sup> |
| 684.0953 | 1 | 6161.99  | (2M+Na) <sup>+</sup> |
| 685.0911 | 1 | 8664.13  | (2M+Na) <sup>+</sup> |

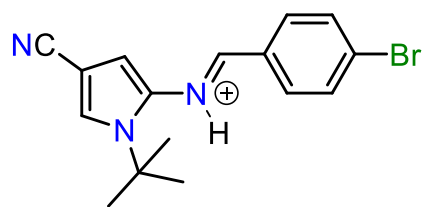

**6h** + H<sup>+</sup>, C<sub>16</sub>H<sub>17</sub>BrN<sub>3</sub>  
 Exact Mass: 330.0600  
 Found: 330.0599

**Figure 15.** HRMS analysis of compound **6h**

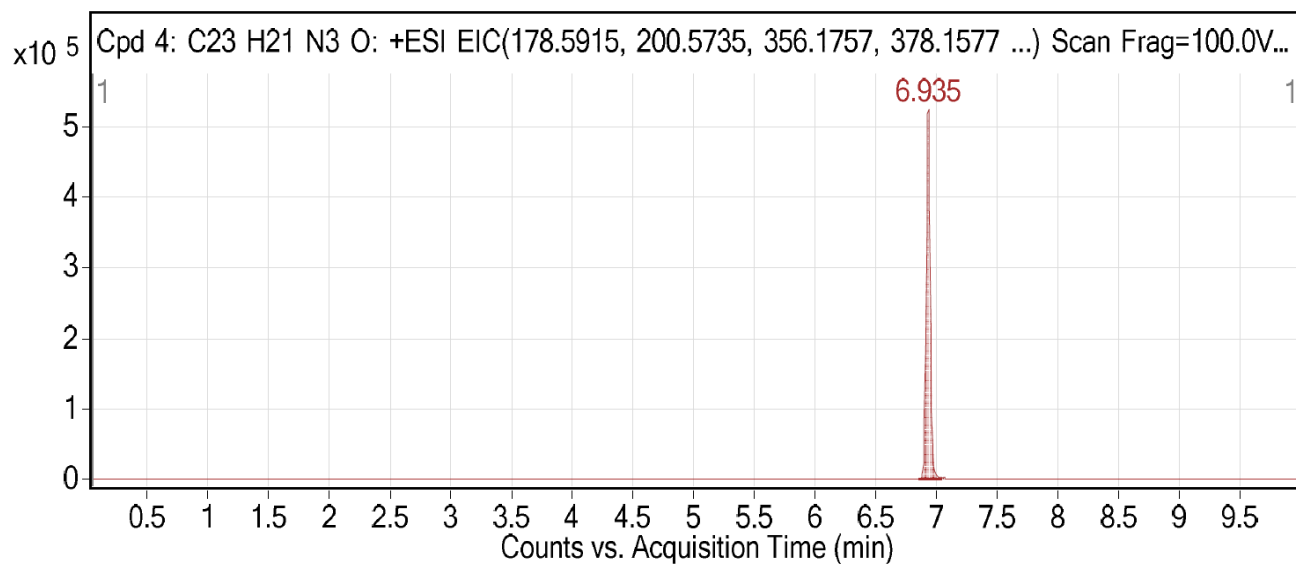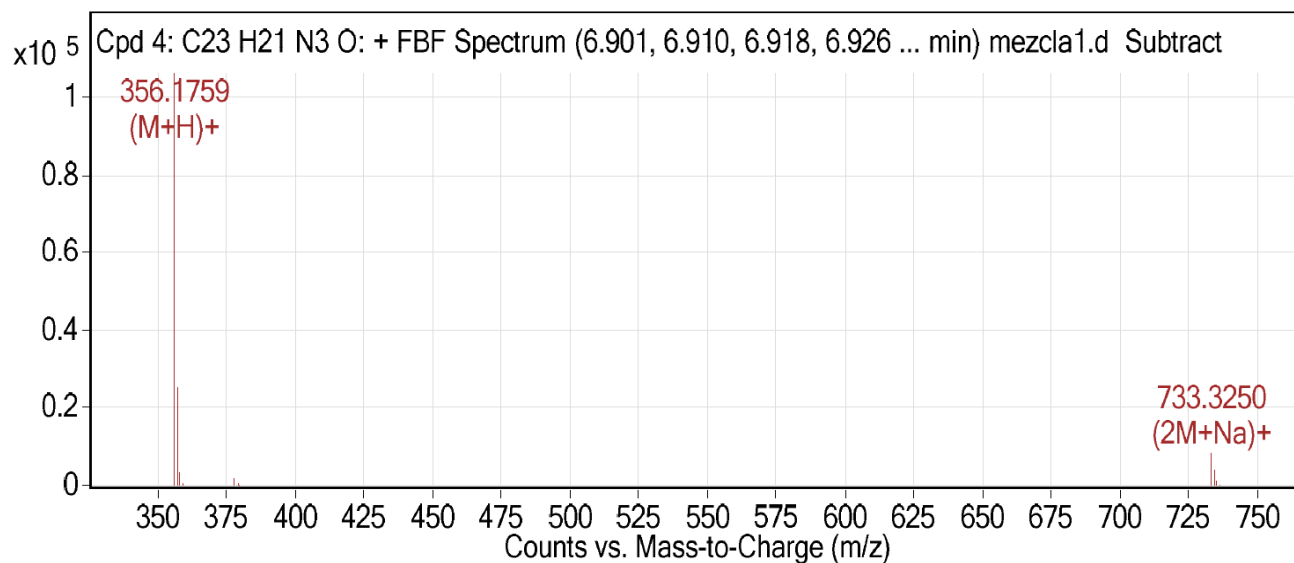

#### MS Spectrum Peak List

| <i>m/z</i> | <i>z</i> | Abund     | Ion                  |
|------------|----------|-----------|----------------------|
| 356.1759   | 1        | 106107.77 | (M+H) <sup>+</sup>   |
| 357.1788   | 1        | 25264.63  | (M+H) <sup>+</sup>   |
| 358.1827   | 1        | 3512      | (M+H) <sup>+</sup>   |
| 359.1859   | 1        | 345.56    | (M+H) <sup>+</sup>   |
| 378.1569   | 1        | 1903.15   | (M+Na) <sup>+</sup>  |
| 379.1589   | 1        | 513.67    | (M+Na) <sup>+</sup>  |
| 733.325    | 1        | 8028.62   | (2M+Na) <sup>+</sup> |
| 734.3282   | 1        | 4017.23   | (2M+Na) <sup>+</sup> |
| 735.333    | 1        | 1011.23   | (2M+Na) <sup>+</sup> |
| 736.3332   | 1        | 167.19    | (2M+Na) <sup>+</sup> |

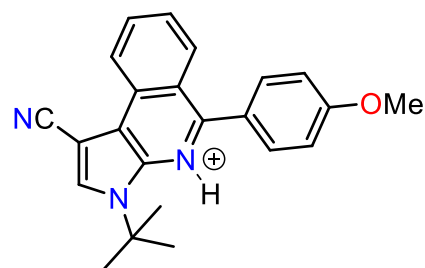

**8a** + H<sup>+</sup>, C<sub>23</sub>H<sub>22</sub>N<sub>3</sub>O  
 Exact Mass: 356.1757  
 Found: 356.1759

**Figure 16.** HRMS analysis of compound **8a**

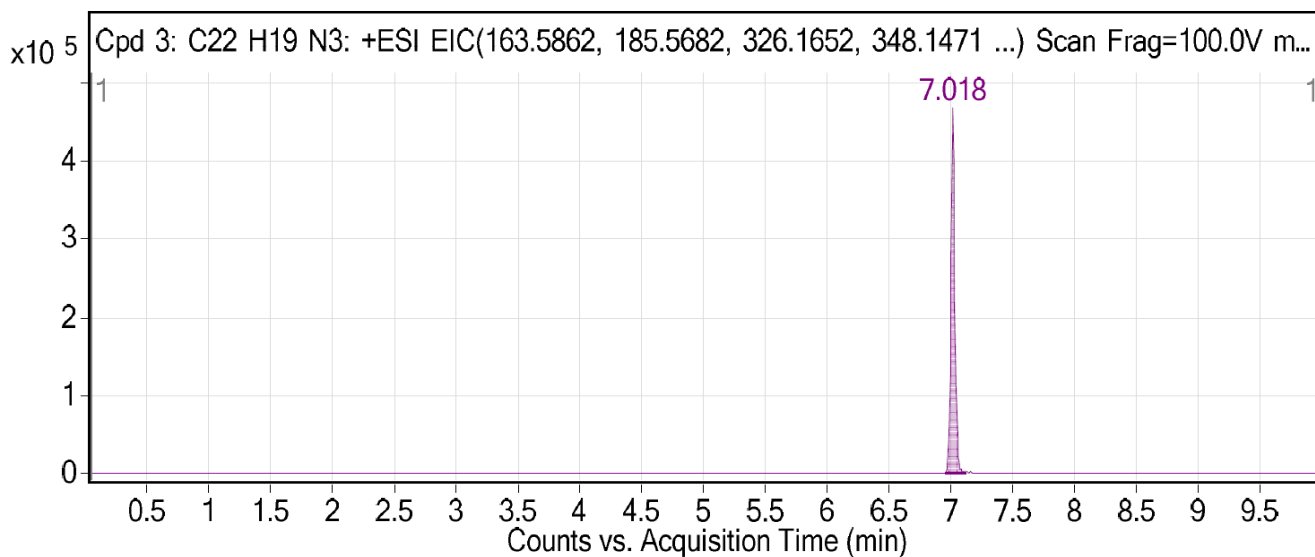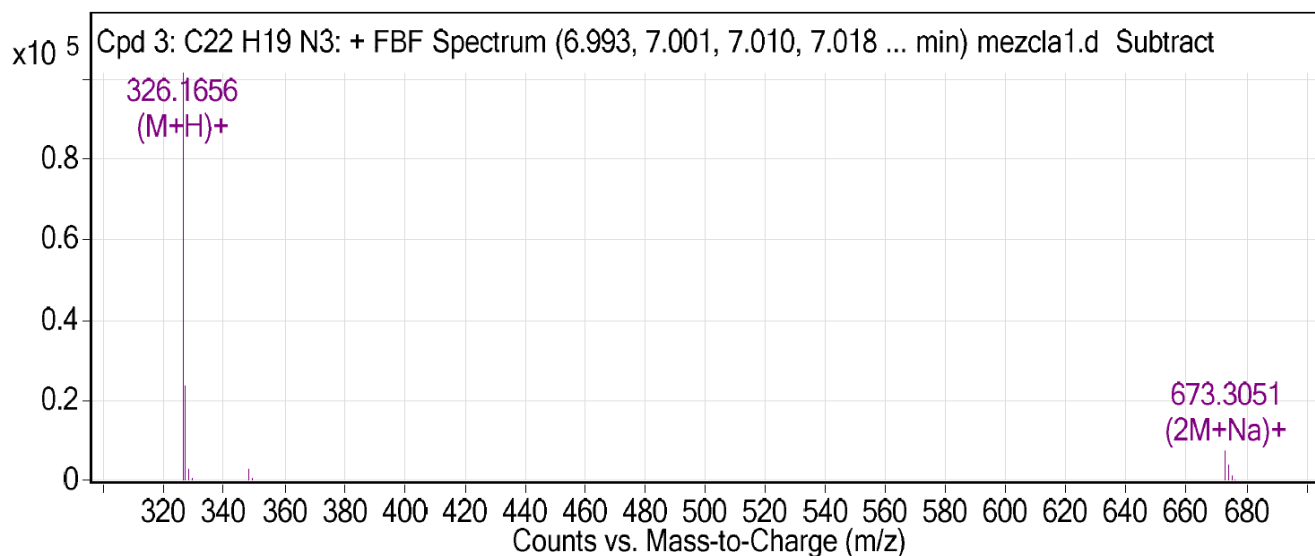

#### MS Spectrum Peak List

| m/z      | z | Abund    | Ion                  |
|----------|---|----------|----------------------|
| 326.1656 | 1 | 101611.7 | (M+H) <sup>+</sup>   |
| 327.1685 | 1 | 23636.46 | (M+H) <sup>+</sup>   |
| 328.1708 | 1 | 2793.57  | (M+H) <sup>+</sup>   |
| 329.1729 | 1 | 329.5    | (M+H) <sup>+</sup>   |
| 348.1482 | 1 | 2584.96  | (M+Na) <sup>+</sup>  |
| 349.1541 | 1 | 524.32   | (M+Na) <sup>+</sup>  |
| 673.3051 | 1 | 7429.84  | (2M+Na) <sup>+</sup> |
| 674.3085 | 1 | 3754.03  | (2M+Na) <sup>+</sup> |
| 675.3104 | 1 | 1029.76  | (2M+Na) <sup>+</sup> |
| 676.3115 | 1 | 125.03   | (2M+Na) <sup>+</sup> |

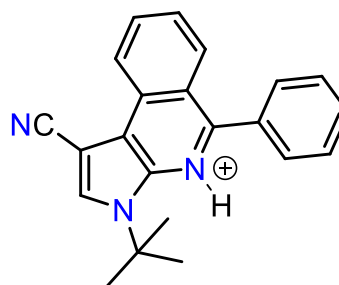

**8b** + H<sup>+</sup>, C<sub>22</sub>H<sub>20</sub>N<sub>3</sub>  
 Exact Mass: 326.1652  
 Found: 326.1656

**Figure 17.** HRMS analysis of compound **8b**



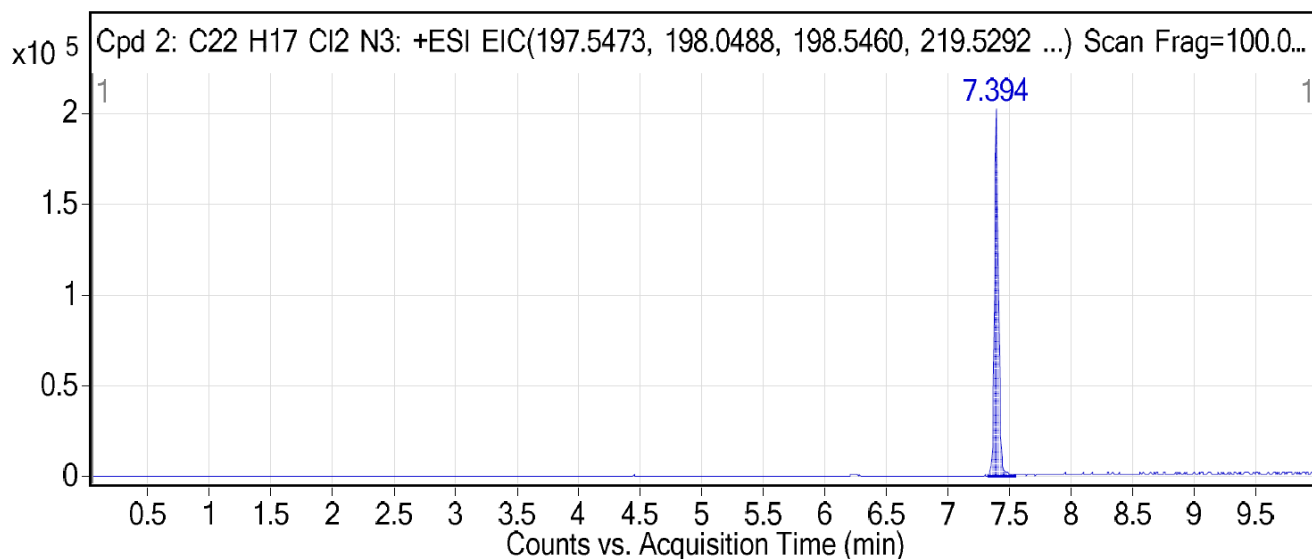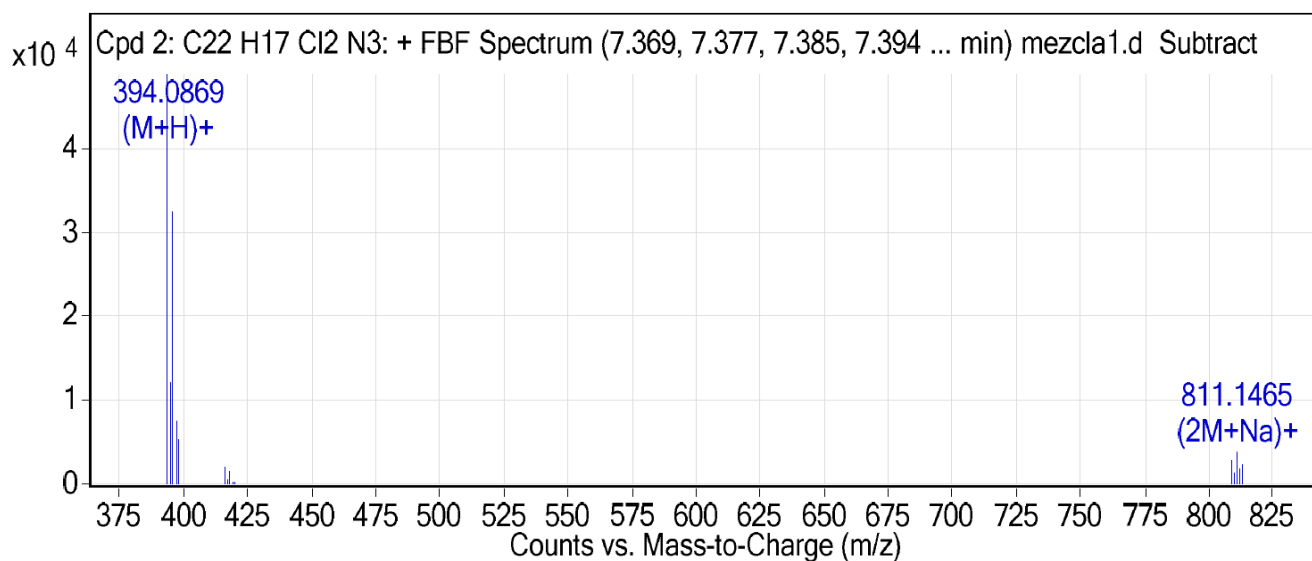

#### MS Spectrum Peak List

| m/z      | z | Abund    | Ion                  |
|----------|---|----------|----------------------|
| 394.0869 | 1 | 48728.49 | (M+H) <sup>+</sup>   |
| 395.0902 | 1 | 12029.53 | (M+H) <sup>+</sup>   |
| 396.0844 | 1 | 32304.44 | (M+H) <sup>+</sup>   |
| 397.0873 | 1 | 7652.69  | (M+H) <sup>+</sup>   |
| 398.0824 | 1 | 5307.71  | (M+H) <sup>+</sup>   |
| 416.0693 | 1 | 2085.37  | (M+Na) <sup>+</sup>  |
| 809.1481 | 1 | 2794.52  | (2M+Na) <sup>+</sup> |
| 811.1465 | 1 | 3879.95  | (2M+Na) <sup>+</sup> |
| 812.1485 | 1 | 1723.34  | (2M+Na) <sup>+</sup> |
| 813.1452 | 1 | 2198.54  | (2M+Na) <sup>+</sup> |

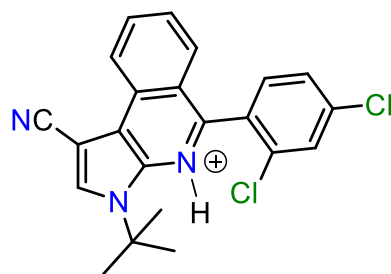

**8c** + H<sup>+</sup>, C<sub>22</sub>H<sub>18</sub>Cl<sub>2</sub>N<sub>3</sub>  
 Exact Mass: 394.0872  
 Found: 394.0869

**Figure 18.** HRMS analysis of compound **8c**

#### 4. ORTEP plots of compounds 6e–g and 8b–c

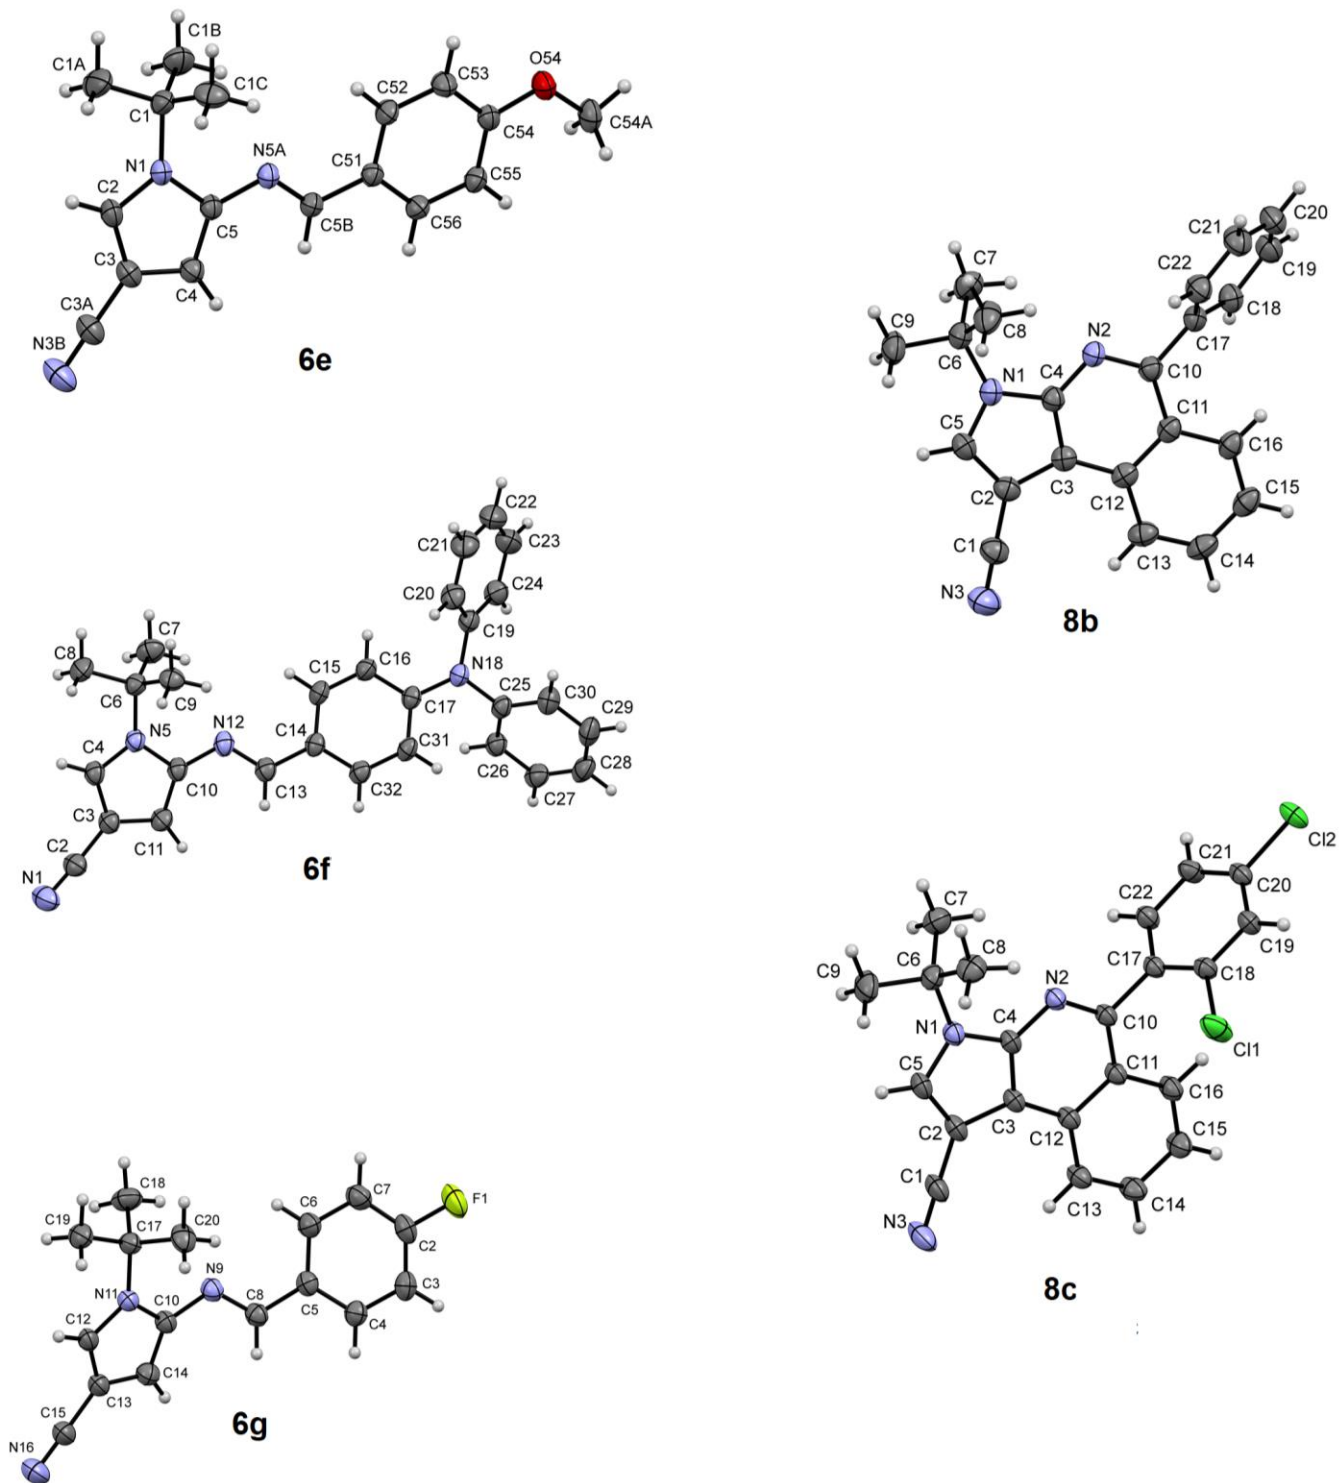

**Figure S19.** Oak Ridge Thermal Ellipsoid Plots (ORTEP) of the crystal structures showing anisotropic displacement ellipsoids at the 30% probability level. CCDC 1817750 (**6e**), 1817752 (**6f**), 1899534 (**6g**), 1817752 (**8b**), and 1899534 (**8c**), contain the supplementary crystallographic data for this paper.

## 5. Tables and figures of crystallographic details

**Table S1.** Crystallographic data for (*E*)-arylideneaminopyrroles **6e–g** and pyrrolo[2,3-*c*]isoquinolines **8b–c**

|                                                                                                                | <b>6e</b>                                        | <b>6f</b>                                      | <b>6g</b>                                       | <b>8b</b>                                                     | <b>8c</b>                                                      |
|----------------------------------------------------------------------------------------------------------------|--------------------------------------------------|------------------------------------------------|-------------------------------------------------|---------------------------------------------------------------|----------------------------------------------------------------|
| <b>Crystal data</b>                                                                                            |                                                  |                                                |                                                 |                                                               |                                                                |
| Chemical formula                                                                                               | C <sub>17</sub> H <sub>19</sub> N <sub>3</sub> O | C <sub>28</sub> H <sub>26</sub> N <sub>4</sub> | C <sub>16</sub> H <sub>16</sub> FN <sub>3</sub> | <u>C<sub>22</sub>H<sub>19</sub>N<sub>3</sub></u>              | <u>C<sub>22</sub>H<sub>17</sub>Cl<sub>2</sub>N<sub>3</sub></u> |
| <i>M<sub>r</sub></i>                                                                                           | 281.35                                           | 418.53                                         | 269.32                                          | <u>325.40</u>                                                 | <u>394.28</u>                                                  |
| Crystal system, space group                                                                                    | Triclinic, <i>P1</i> $\bar{1}$                   | Monoclinic, <i>P2</i> <sub>1</sub> / <i>c</i>  | Monoclinic, <i>P2</i> <sub>1</sub> / <i>c</i>   | <u>Orthorhombic, <i>Pna2</i><sub>1</sub></u>                  | Triclinic, <i>P1</i> $\bar{1}$                                 |
| <i>a</i> , <i>b</i> , <i>c</i> (Å)                                                                             | 6.5117(9),<br>10.8618(15),<br>12.3586(14)        | 9.813(2), 25.305(4),<br>9.7316(11)             | 8.8167(10),<br>17.559(2), 9.4619(9)             | <u>8.8186(12),</u><br><u>10.9933(15),</u><br><u>18.078(2)</u> | <u>8.4643(7),</u><br><u>9.8411(8),</u><br><u>12.2281(6)</u>    |
| $\alpha$ , $\beta$ , $\gamma$ (°)                                                                              | 107.350(11),<br>96.512(11),<br>106.366(13)       | 90.0, 101.981(14),<br>90.0                     | 90.0, 90.43(1), 90.0                            | <u>90.0, 90.0, 90.0</u>                                       | <u>97.028(6),</u><br><u>98.958(6), 96.320(7)</u>               |
| <i>V</i> (Å <sup>3</sup> )                                                                                     | 781.70(19)                                       | 2363.9(7)                                      | 1464.8(3)                                       | <u>1752.6(4)</u>                                              | <u>989.90(13)</u>                                              |
| <i>Z</i>                                                                                                       | 2                                                | 4                                              | 4                                               | <u>4</u>                                                      | <u>2</u>                                                       |
| $\mu$ (mm <sup>-1</sup> )                                                                                      | 0.08                                             | 0.07                                           | 0.08                                            | <u>0.07</u>                                                   | <u>0.34</u>                                                    |
| Crystal size (mm)                                                                                              | 0.31×0.25×0.19                                   | 0.23×0.17×0.14                                 | 0.21×0.15×0.15                                  | <u>0.21×0.16×0.15</u>                                         | <u>0.25×0.20×0.19</u>                                          |
| <b>Data collection</b>                                                                                         |                                                  |                                                |                                                 |                                                               |                                                                |
| <i>T</i> <sub>min</sub> , <i>T</i> <sub>max</sub>                                                              | 0.804, 1.000                                     | 0.849, 1.000                                   | 0.801, 1.000                                    | <u>0.575, 1.000</u>                                           | <u>0.681, 1.000</u>                                            |
| No. of measured, independent and observed [ <i>I</i> > 2σ( <i>I</i> )] reflections                             | 14240, 4319, 3102                                | 24848, 4822, 3145                              | 28818, 2876, 2356                               | <u>19049, 3840, 3180</u>                                      | <u>43695, 4372, 3475</u>                                       |
| <i>R</i> <sub>int</sub>                                                                                        | 0.031                                            | 0.071                                          | 0.067                                           | <u>0.052</u>                                                  | <u>0.071</u>                                                   |
| (sin θ/λ) <sub>max</sub> (Å <sup>-1</sup> )                                                                    | 0.720                                            | 0.626                                          | 0.617                                           | 0.641                                                         | 0.641                                                          |
| <b>Refinement</b>                                                                                              |                                                  |                                                |                                                 |                                                               |                                                                |
| <i>R</i> [ <i>F</i> <sup>2</sup> > 2σ( <i>F</i> <sup>2</sup> )], <i>wR</i> ( <i>F</i> <sup>2</sup> ), <i>S</i> | 0.058, 0.175, 1.10                               | 0.059, 0.177, 1.07                             | 0.057, 0.160, 1.07                              | <u>0.055, 0.160, 1.11</u>                                     | <u>0.055, 0.156, 1.10</u>                                      |
| No. of reflections                                                                                             | 4319                                             | 4822                                           | 2876                                            | <u>3840</u>                                                   | <u>4372</u>                                                    |
| No. of parameters                                                                                              | 195                                              | 293                                            | 185                                             | <u>230</u>                                                    | <u>248</u>                                                     |
| Δρ <sub>max</sub> , Δρ <sub>min</sub> (e Å <sup>-3</sup> )                                                     | 0.21, -0.16                                      | 0.19, -0.16                                    | 0.19, -0.20                                     | <u>0.17, -0.16</u>                                            | <u>0.24, -0.56</u>                                             |

**Table S2.** CE-B3LYP interaction energies (kJ mol<sup>-1</sup>) for **6e**, **6f** and **6g**<sup>a</sup>

| <b>6e</b> |                   |          |                        |                        |                        |                        |                        |                                                                                      |                                                                                       |
|-----------|-------------------|----------|------------------------|------------------------|------------------------|------------------------|------------------------|--------------------------------------------------------------------------------------|---------------------------------------------------------------------------------------|
| <i>N</i>  | <i>Symop</i>      | <i>R</i> | <i>E<sub>ele</sub></i> | <i>E<sub>pol</sub></i> | <i>E<sub>dis</sub></i> | <i>E<sub>rep</sub></i> | <i>E<sub>tot</sub></i> |                                                                                      |                                                                                       |
| 2         | x, y, z           | 6.51     | 0.1                    | -3.4                   | -56.9                  | 24.7                   | -36.6                  | 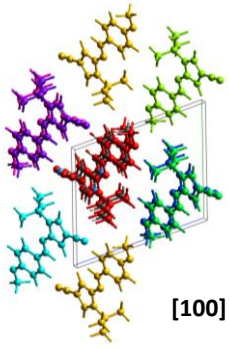  |                                                                                       |
| 2         | x, y, z           | 10.98    | 1.4                    | -0.8                   | -12.5                  | 6.4                    | -5.9                   |                                                                                      |                                                                                       |
| 1         | -x, -y, -z        | 13.25    | -6.4                   | -1.0                   | -17.6                  | 10.2                   | -16.5                  |                                                                                      |                                                                                       |
| 1         | -x, -y, -z        | 8.14     | -5.9                   | -1.4                   | -24.4                  | 14.7                   | -19.5                  |                                                                                      |                                                                                       |
| 1         | -x, -y, -z        | 8.88     | -5.3                   | -1.6                   | -21.1                  | 7.1                    | -20.8                  |                                                                                      |                                                                                       |
| 1         | -x, -y, -z        | 6.77     | -2.8                   | -0.4                   | -22.8                  | 9.0                    | -17.5                  |                                                                                      |                                                                                       |
| 1         | -x, -y, -z        | 6.69     | -20.6                  | -6.3                   | -28.8                  | 22.0                   | -37.9                  |                                                                                      |                                                                                       |
| 1         | -x, -y, -z        | 9.07     | -19.3                  | -7.5                   | -15.2                  | 11.5                   | -32.1                  |                                                                                      |                                                                                       |
| <b>6f</b> |                   |          |                        |                        |                        |                        |                        |                                                                                      |                                                                                       |
| 2         | -x, y+1/2, -z+1/2 | 13.71    | -1.2                   | -0.8                   | -12.7                  | 3.9                    | -10.6                  |  |                                                                                       |
| 1         | -x, -y, -z        | 8.62     | -3.4                   | -0.9                   | -30.3                  | 11.9                   | -23.3                  |                                                                                      |                                                                                       |
| 1         | -x, -y, -z        | 5.39     | -9.8                   | -1.5                   | -80.4                  | 39.2                   | -57.3                  |                                                                                      |                                                                                       |
| 2         | x, -y+1/2, z+1/2  | 13.84    | 0.1                    | -0.2                   | -12.5                  | 2.6                    | -9.4                   |                                                                                      |                                                                                       |
| 2         | x, y, z           | 9.73     | -2.5                   | -1.0                   | -39.9                  | 23.7                   | -23.5                  |                                                                                      |                                                                                       |
| 2         | -x, y+1/2, -z+1/2 | 14.24    | -5.7                   | -3.3                   | -7.4                   | 5.9                    | -11.3                  |                                                                                      |                                                                                       |
| 2         | x, -y+1/2, z+1/2  | 13.27    | -14.0                  | -5.1                   | -18.8                  | 14.6                   | -26.0                  |                                                                                      |                                                                                       |
| 1         | -x, -y, -z        | 10.43    | -1.8                   | -0.2                   | -9.8                   | 2.2                    | -9.3                   |                                                                                      |                                                                                       |
| 1         | -x, -y, -z        | 4.89     | -11.3                  | -2.7                   | -89.5                  | 41.4                   | -66.3                  |                                                                                      |                                                                                       |
| 2         | -x, y+1/2, -z+1/2 | 14.58    | -5.8                   | -3.2                   | -7.4                   | 7.8                    | -10.1                  |                                                                                      |                                                                                       |
| <b>6g</b> |                   |          |                        |                        |                        |                        |                        |                                                                                      |                                                                                       |
| 2         | x, y, z           | 12.88    | -6.1                   | -1.0                   | -9.0                   | 4.8                    | -12.1                  |                                                                                      |  |
| 2         | x, -y+1/2, z+1/2  | 10.91    | -0.6                   | -0.3                   | -10.7                  | 3.6                    | -7.9                   |                                                                                      |                                                                                       |
| 2         | x, y, z           | 8.82     | 0.8                    | -0.7                   | -16.7                  | 9.3                    | -8.5                   |                                                                                      |                                                                                       |
| 2         | x, -y+1/2, z+1/2  | 6.48     | -2.9                   | -1.7                   | -34.9                  | 17.6                   | -23.8                  |                                                                                      |                                                                                       |
| 2         | x, y, z           | 9.46     | -2.4                   | -3.2                   | -15.0                  | 4.6                    | -15.1                  |                                                                                      |                                                                                       |
| 1         | -x, -y, -z        | 5.53     | -1.9                   | -2.3                   | -54.7                  | 26.0                   | -35.2                  |                                                                                      |                                                                                       |
| 1         | -x, -y, -z        | 8.72     | -31.0                  | -9.1                   | -19.1                  | 23.4                   | -41.7                  |                                                                                      |                                                                                       |
| 1         | -x, -y, -z        | 8.04     | 0.0                    | -0.2                   | -5.8                   | 1.2                    | -4.4                   |                                                                                      |                                                                                       |
| 1         | -x, -y, -z        | 10.44    | -16.7                  | -5.5                   | -16.4                  | 13.3                   | -27.8                  |                                                                                      |                                                                                       |

<sup>a</sup> *N* is the number of molecules with an *R* molecular centroid-to-centroid distance (Å). Electron density was calculated using B3LYP/6-31G(d,p) model energies. *Symop* is the symmetry operation. Note: (\*) scale factors used to determine *E<sub>tot</sub>*: *E<sub>ele</sub>* = 1.057; *E<sub>pol</sub>* = 0.740; *E<sub>dis</sub>* = 0.871; *E<sub>rep</sub>* = 0.618.

**Table S3.** CE-B3LYP interaction energies (kJ mol<sup>-1</sup>) for **8b** and **8c**<sup>a</sup>

| <b>8b</b> |                      |          |                        |                        |                        |                        |                        |
|-----------|----------------------|----------|------------------------|------------------------|------------------------|------------------------|------------------------|
| <i>N</i>  | <i>Symop</i>         | <i>R</i> | <i>E<sub>ele</sub></i> | <i>E<sub>pol</sub></i> | <i>E<sub>dis</sub></i> | <i>E<sub>rep</sub></i> | <i>E<sub>tot</sub></i> |
| 2         | x+1/2, -y+1/2, z     | 5.72     | -12.8                  | -5.0                   | -75.1                  | 35.3                   | -60.9                  |
| 2         | x+1/2, -y+1/2, z     | 8.57     | -5.5                   | -1.0                   | -34.8                  | 23.5                   | -22.4                  |
| 2         | x, y, z              | 10.99    | -5.0                   | -1.6                   | -7.7                   | 1.9                    | -12.0                  |
| 2         | -x+1/2, y+1/2, z+1/2 | 10.87    | -2.9                   | -2.3                   | -12.5                  | 6.6                    | -11.5                  |
| 2         | -x, -y, z+1/2        | 9.43     | -5.8                   | -1.4                   | -30.3                  | 17.5                   | -22.7                  |
| 2         | x, y, z              | 8.82     | 1.5                    | -0.1                   | -4.5                   | 0.1                    | -2.4                   |
| 2         | -x+1/2, y+1/2, z+1/2 | 10.87    | -0.4                   | -0.4                   | -10.6                  | 6.0                    | -6.3                   |

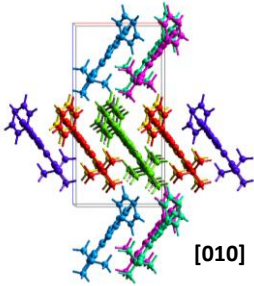
  

| <b>8c</b> |              |          |                        |                        |                        |                        |                        |
|-----------|--------------|----------|------------------------|------------------------|------------------------|------------------------|------------------------|
| <i>N</i>  | <i>Symop</i> | <i>R</i> | <i>E<sub>ele</sub></i> | <i>E<sub>pol</sub></i> | <i>E<sub>dis</sub></i> | <i>E<sub>rep</sub></i> | <i>E<sub>tot</sub></i> |
| 1         | -x, -y, -z   | 7.65     | -8.7                   | -1.9                   | -50.4                  | 25.4                   | -38.9                  |
| 1         | -x, -y, -z   | 13.05    | -21.7                  | -6.5                   | -13.5                  | 13.8                   | -31.0                  |
| 2         | x, y, z      | 12.25    | -1.9                   | -0.5                   | -11.8                  | 6.4                    | -8.8                   |
| 1         | -x, -y, -z   | 11.92    | -0.4                   | -0.2                   | -3.3                   | 0.1                    | -3.3                   |
| 2         | x, y, z      | 8.46     | -2.7                   | -2.1                   | -36.4                  | 23.9                   | -21.3                  |
| 1         | -x, -y, -z   | 10.88    | -1.0                   | -0.1                   | -6.0                   | 0.8                    | -5.8                   |
| 2         | x, y, z      | 9.84     | -0.7                   | -0.1                   | -6.3                   | 2.2                    | -5.0                   |
| 1         | -x, -y, -z   | 7.39     | -19.9                  | -6.7                   | -72.0                  | 41.7                   | -62.9                  |
| 1         | -x, -y, -z   | 11.75    | -4.3                   | -0.4                   | -14.9                  | 14.6                   | -8.8                   |
| 1         | -x, -y, -z   | 7.95     | -6.3                   | -1.6                   | -46.7                  | 26.9                   | -31.8                  |
| 1         | -x, -y, -z   | 8.52     | -8.8                   | -1.3                   | -42.1                  | 30.6                   | -27.9                  |



<sup>a</sup> *N* is the number of molecules with an *R* molecular centroid-to-centroid distance (Å). Electron density was calculated using B3LYP/6-31G(d,p) model energies.

*Symop* is the symmetry operation. Note: (\*) scale factors used to determine *E<sub>tot</sub>*: *E<sub>ele</sub>* = 1.057; *E<sub>pol</sub>* = 0.740; *E<sub>dis</sub>* = 0.871; *E<sub>rep</sub>* = 0.618.

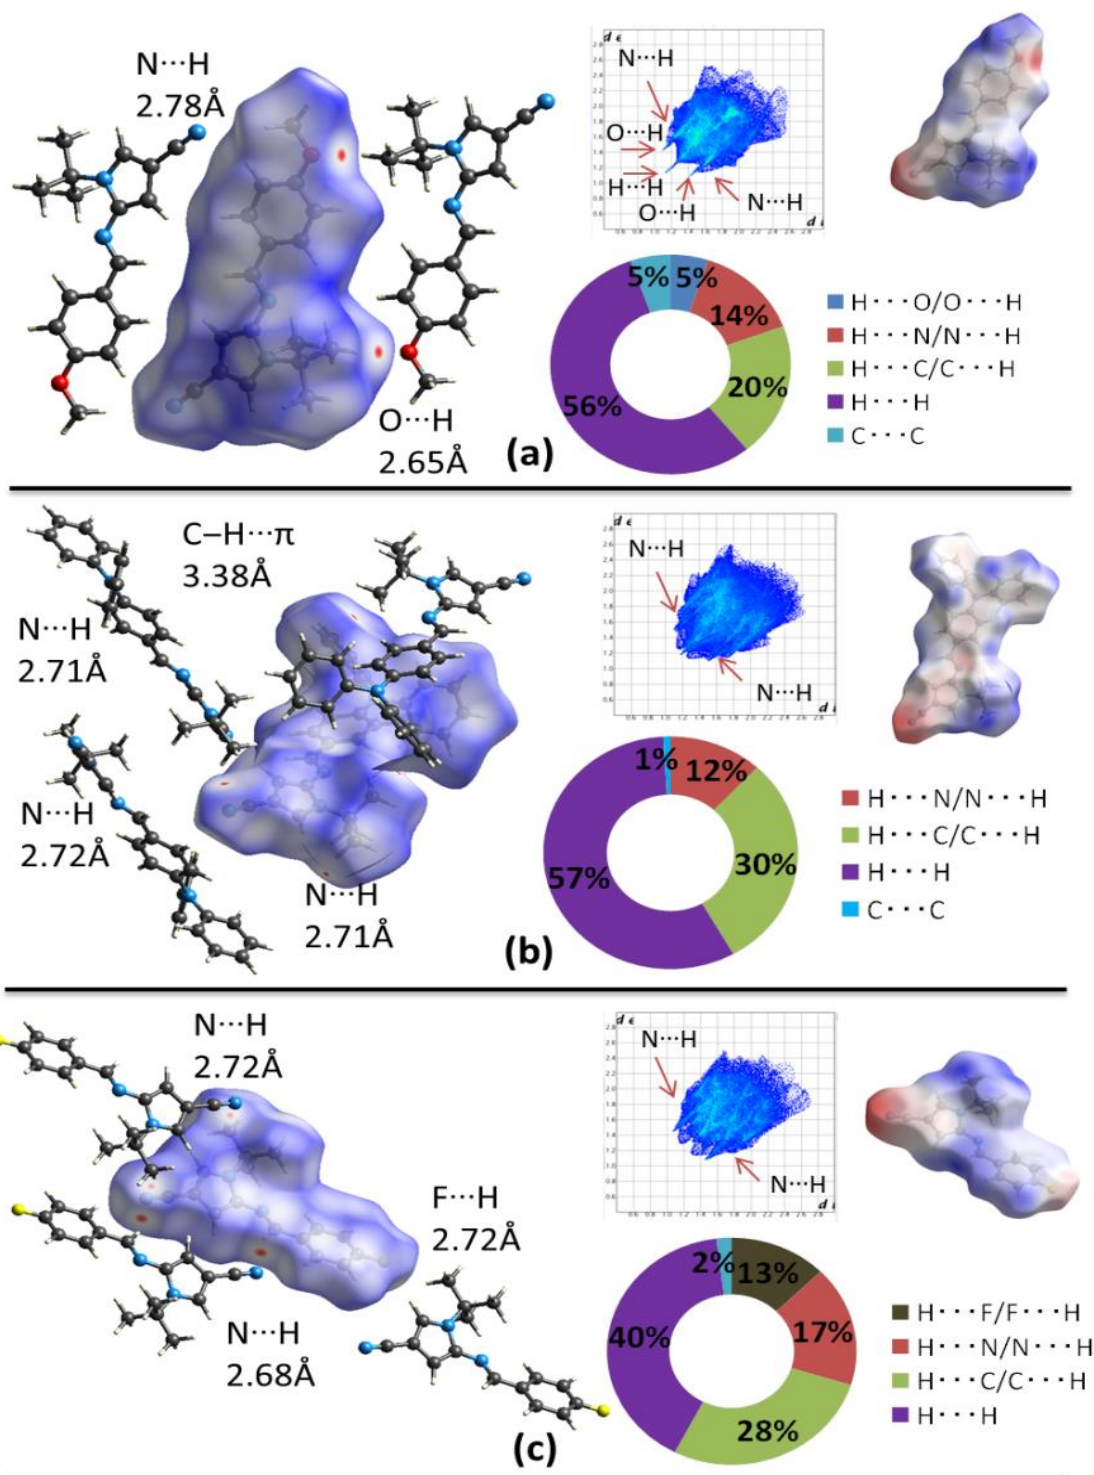

**Figure S20.** Hirshfeld surfaces mapped over  $d_{\text{norm}}$ , full 2D fingerprint plots and relative contributions (%) to the Hirshfeld surface area for the various close intermolecular contacts in (a) **6e**, (b) **6f** and (c) **6g**. On the top right-hand corner: the electrostatic potentials with positive and negative potential indicated in blue and red, respectively.



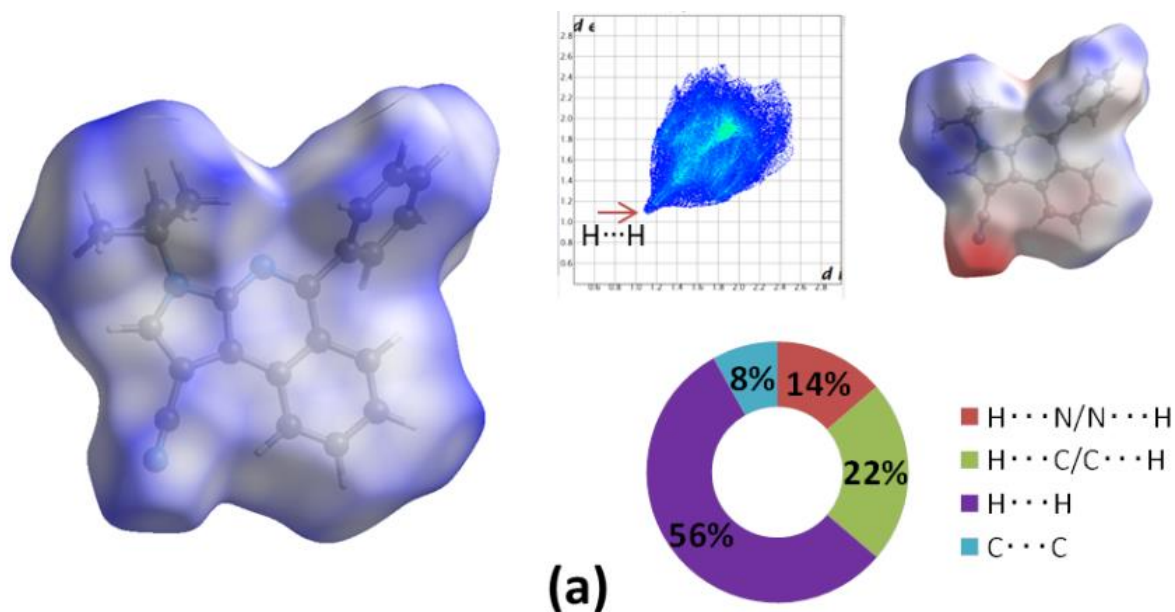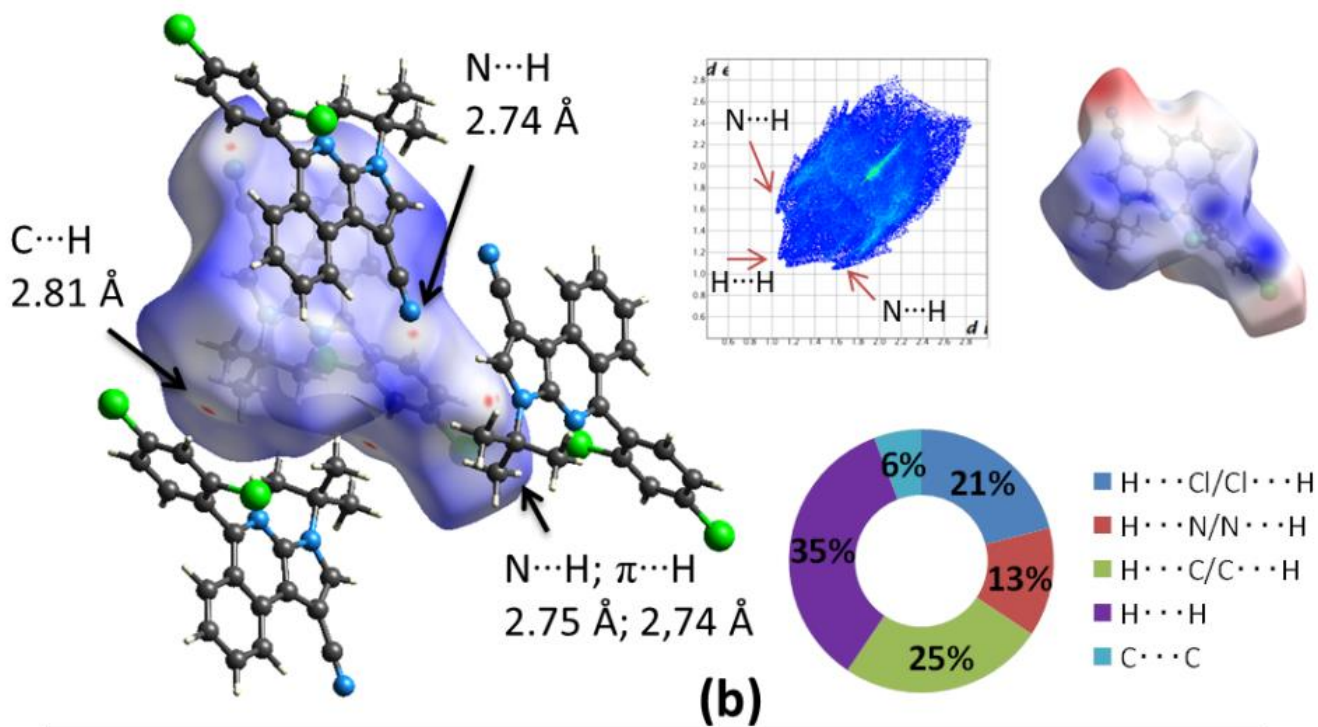

**Figure S21.** Hirshfeld surfaces mapped over  $d_{\text{norm}}$ , full 2D fingerprint plots and relative contributions (%) to the Hirshfeld surface area for the various close intermolecular contacts in (a) **8b** and (b) **8c**. On the top right-hand corner: the electrostatic potentials with positive and negative potential indicated in blue and red, respectively.
